# Supplementary material for: Identification of Transgene-Free CRISPR-Edited Plants of Rice, Tomato, and Arabidopsis by Monitoring DsRED Fluorescence in Dry Seeds
Source: PubMed Central journal article supplement (PMC6759815; doi:10.3389/fpls.2019.01150), 2019-09-18
Supplement: DataSheet_1.pdf [file DataSheet_1.pdf]

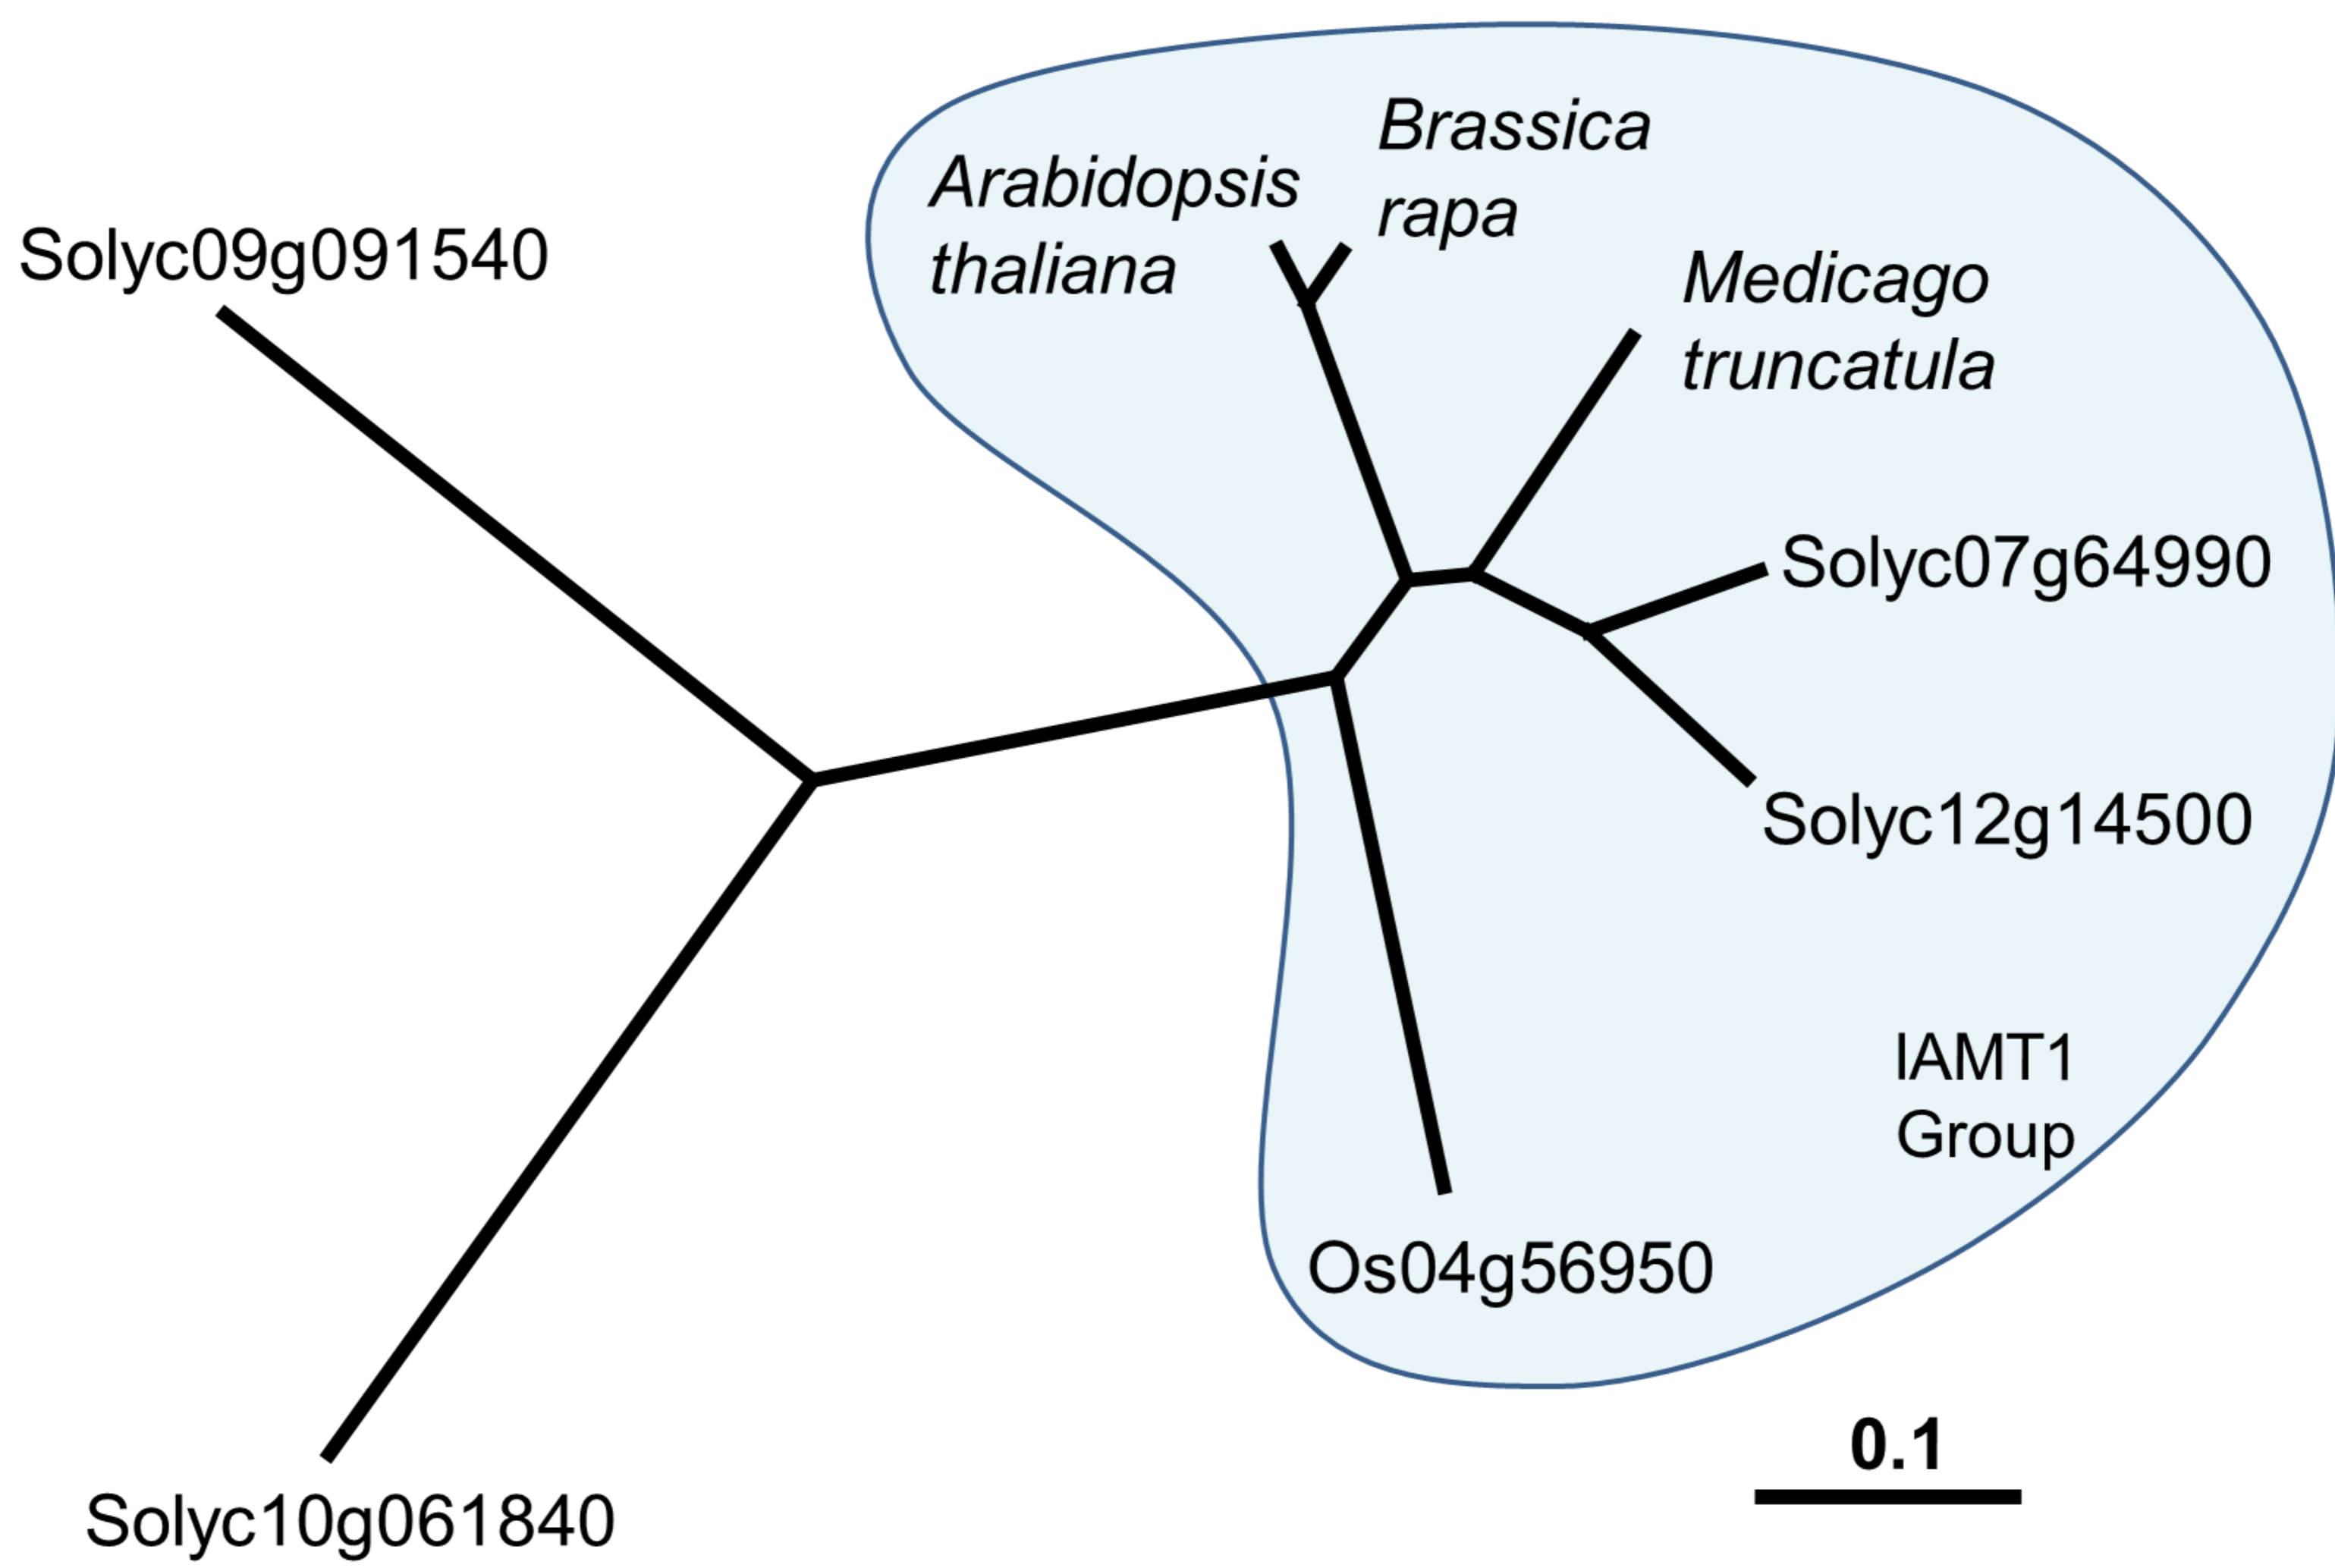

**Supplemental Figure 1:** Phylogenetic analysis for the identification of the *IAMT1* orthologs candidates in *Solanum Lycopersicum*. Only genes *Solyc07g64990* and *Solyc12g14500* were grouped with the other plant *IAMT1* (*Brassica rapa*: *LOC103844968*; *Medicago truncatula*: *Medtr3g054330*).

### sgRNA cloning (multiplexing)

*Arabidopsis thaliana*

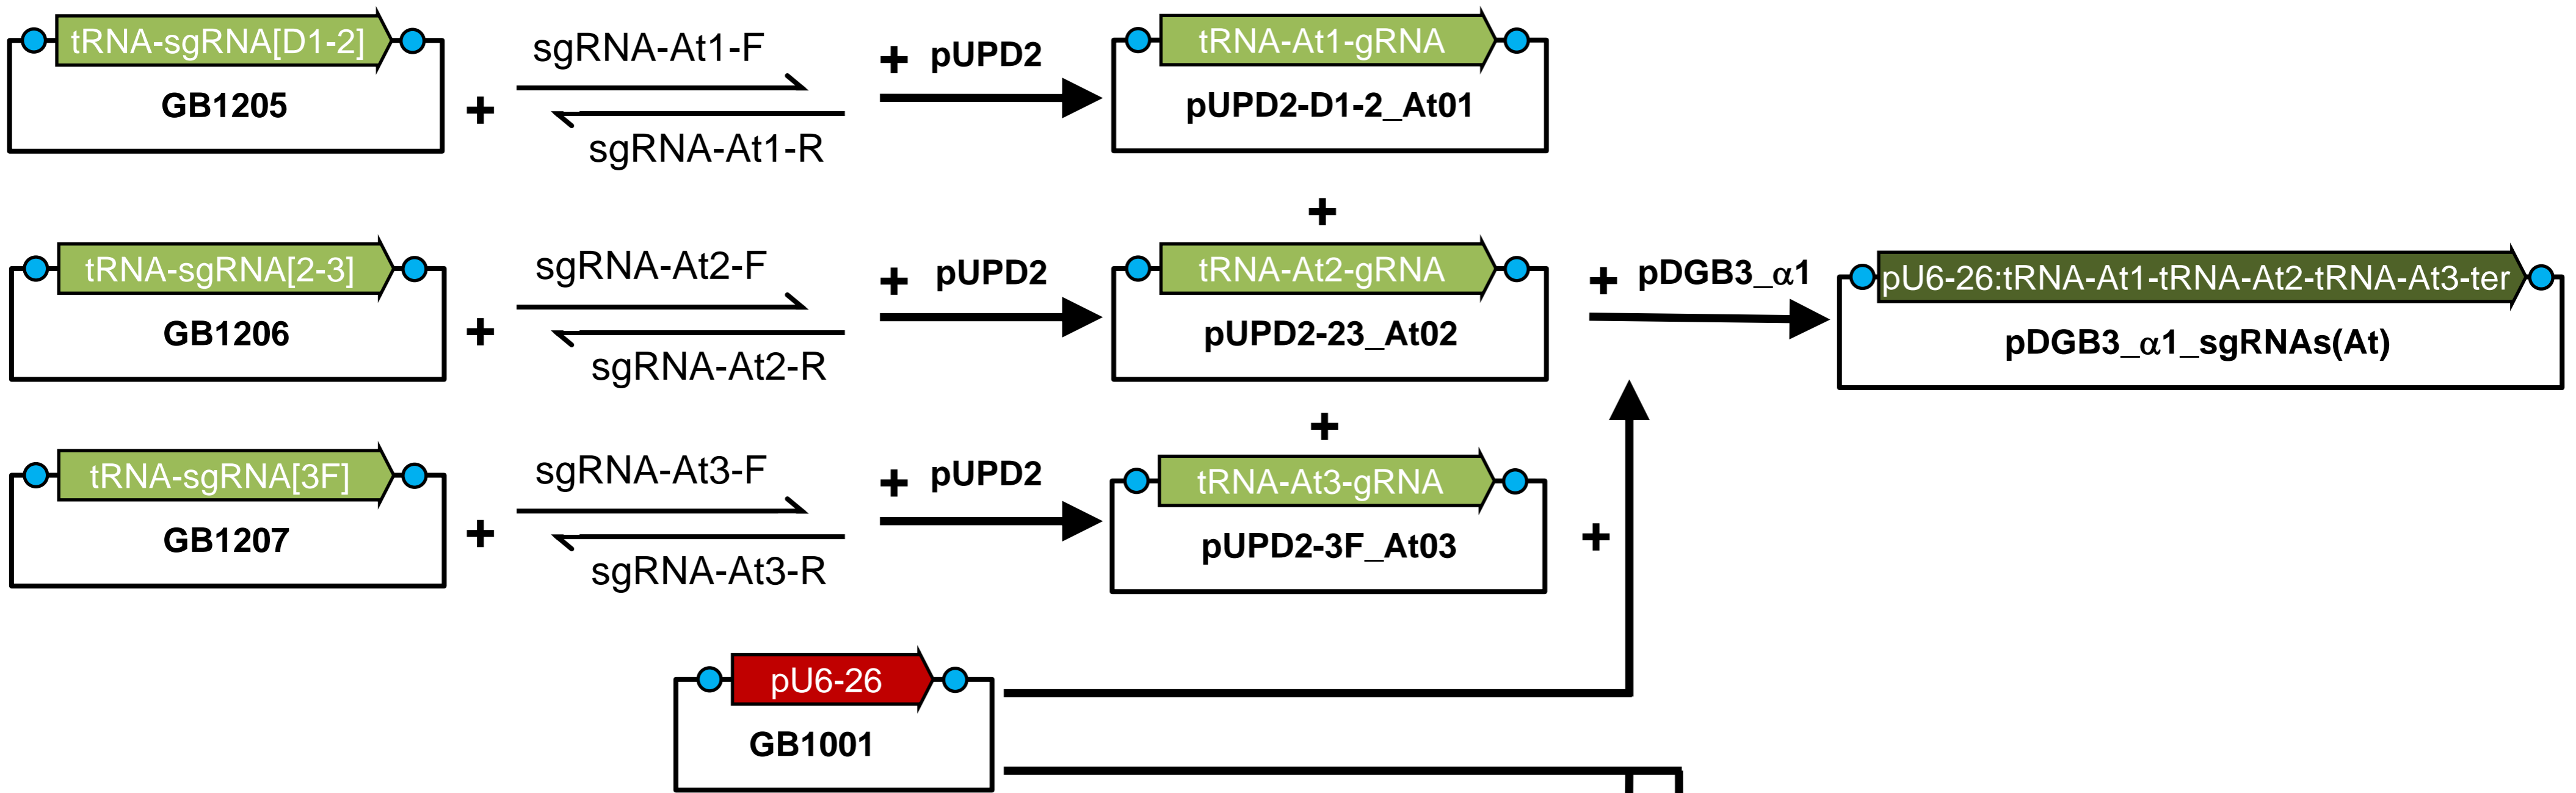

*Solanum Lycopersicum*

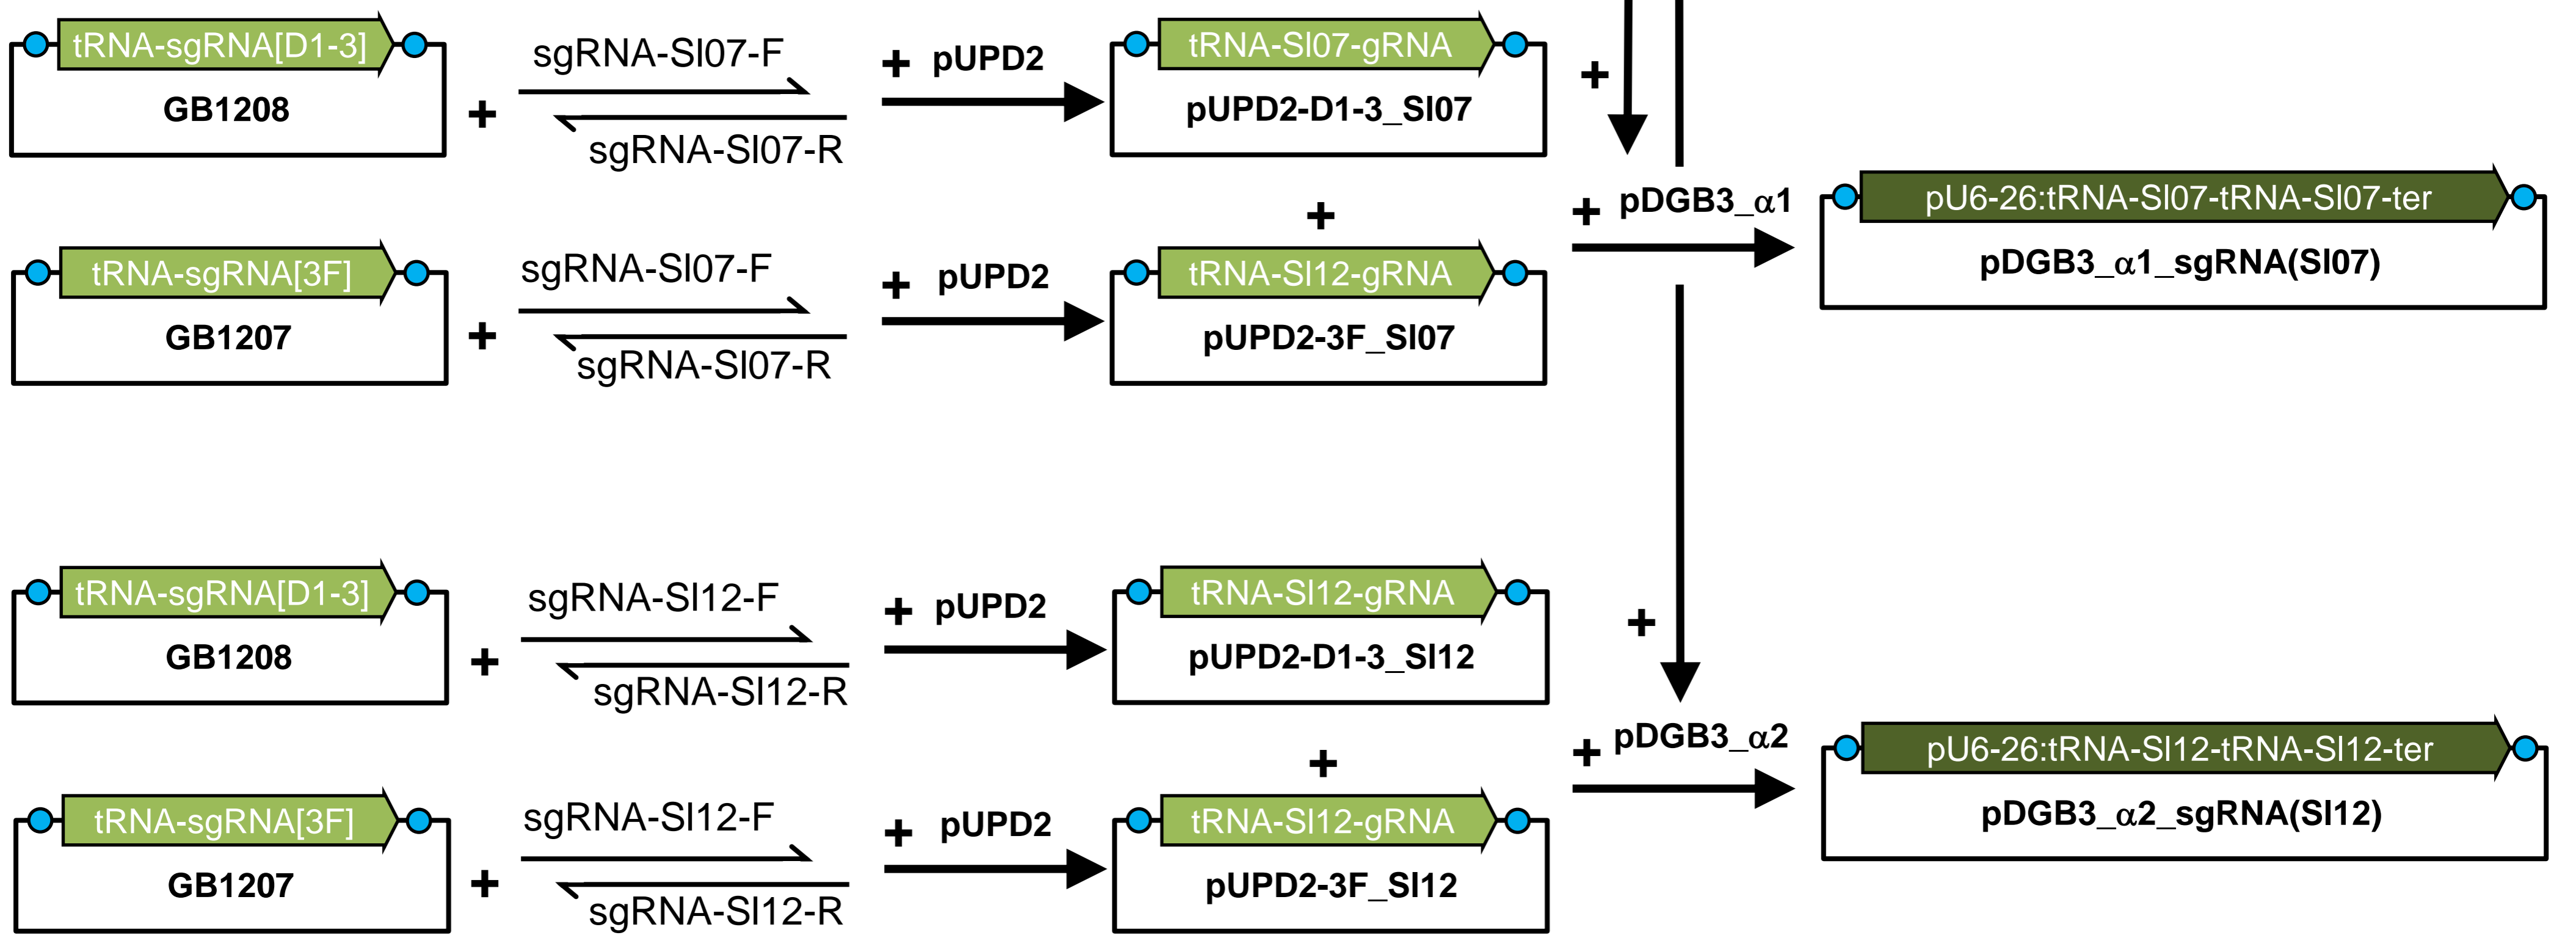

*Oryza sativa*

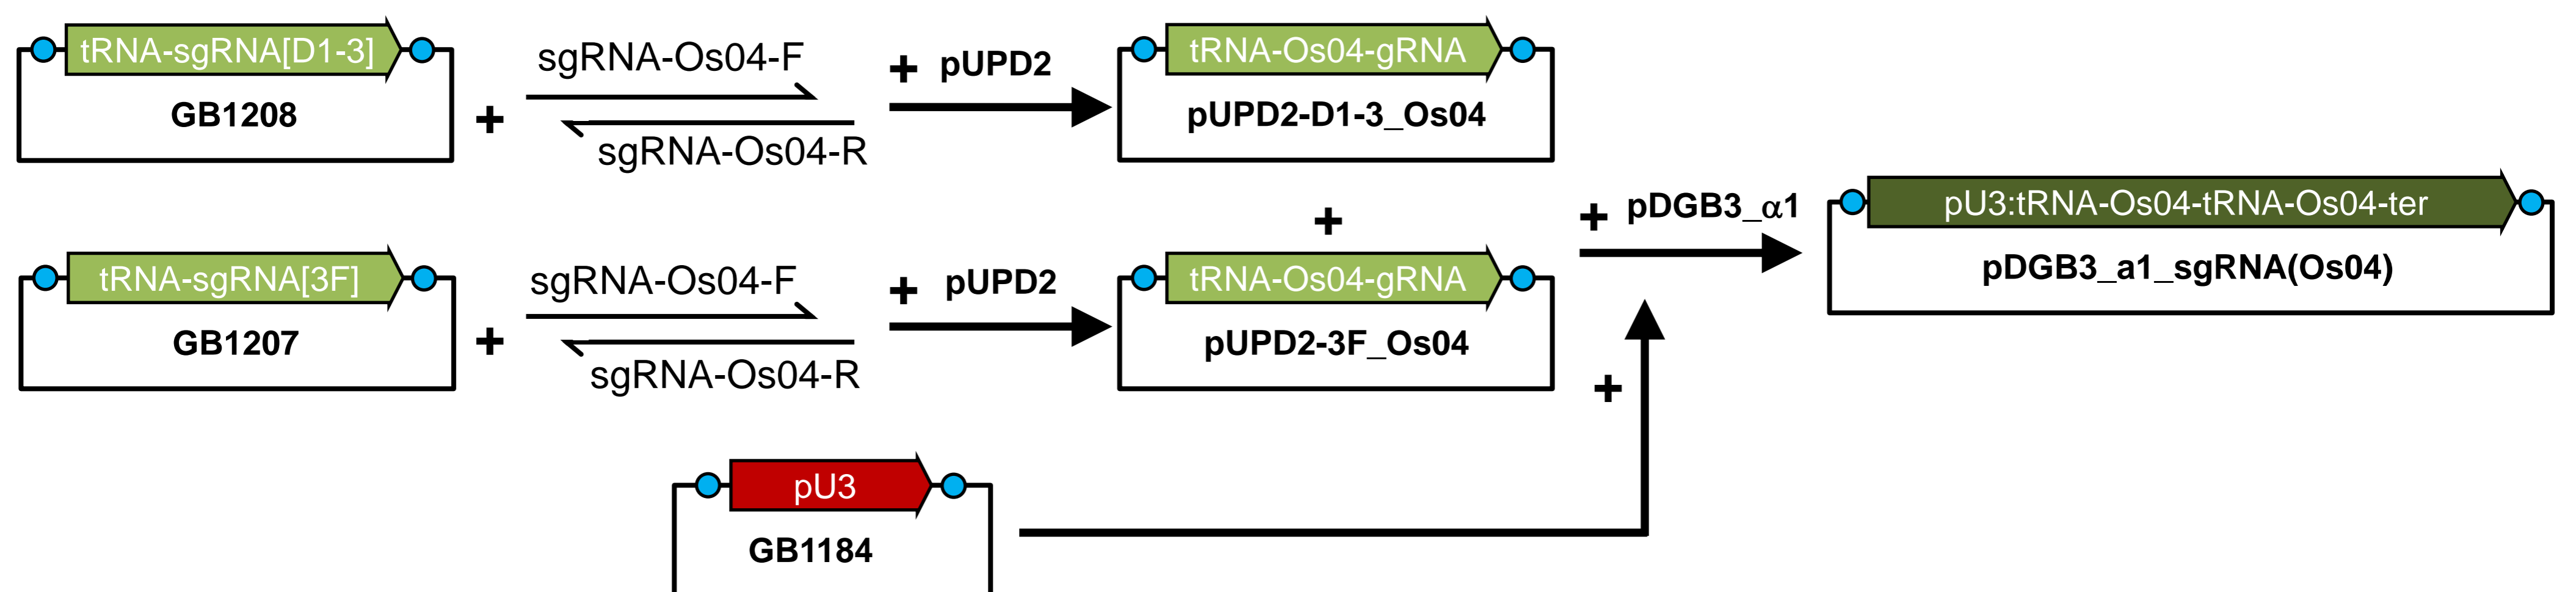

**Supplemental Figure 2.** Sequential steps for sgRNA cloning (multiplexing) and generation of sgRNA transcriptional units in pDGB3 vectors.

### Oryza sativa Cloning Strategy

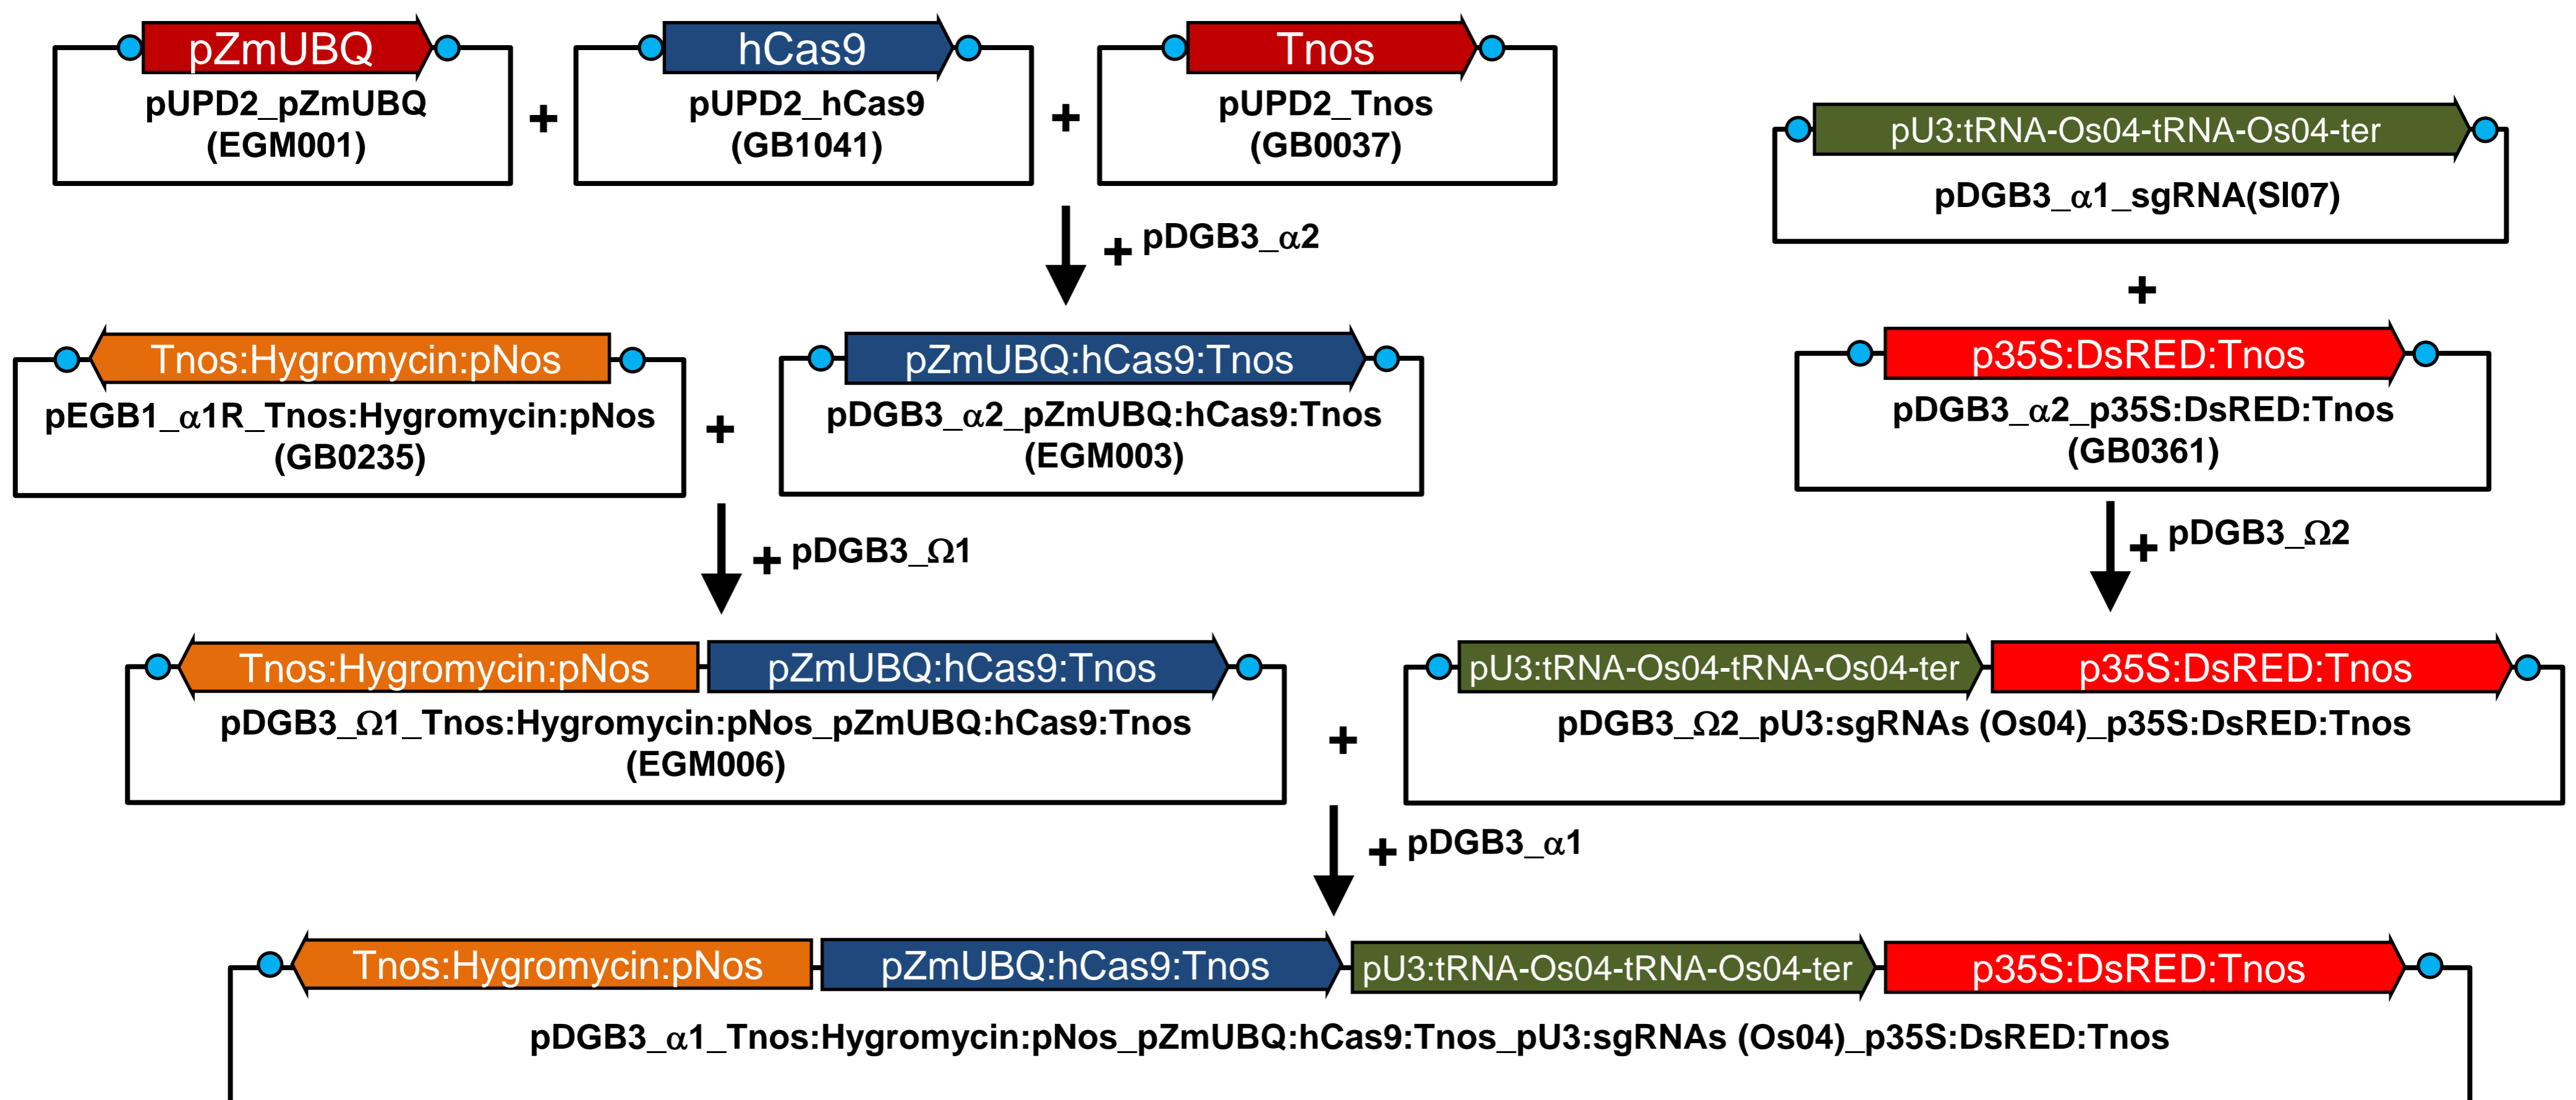

### Arabidopsis thaliana Cloning Strategy

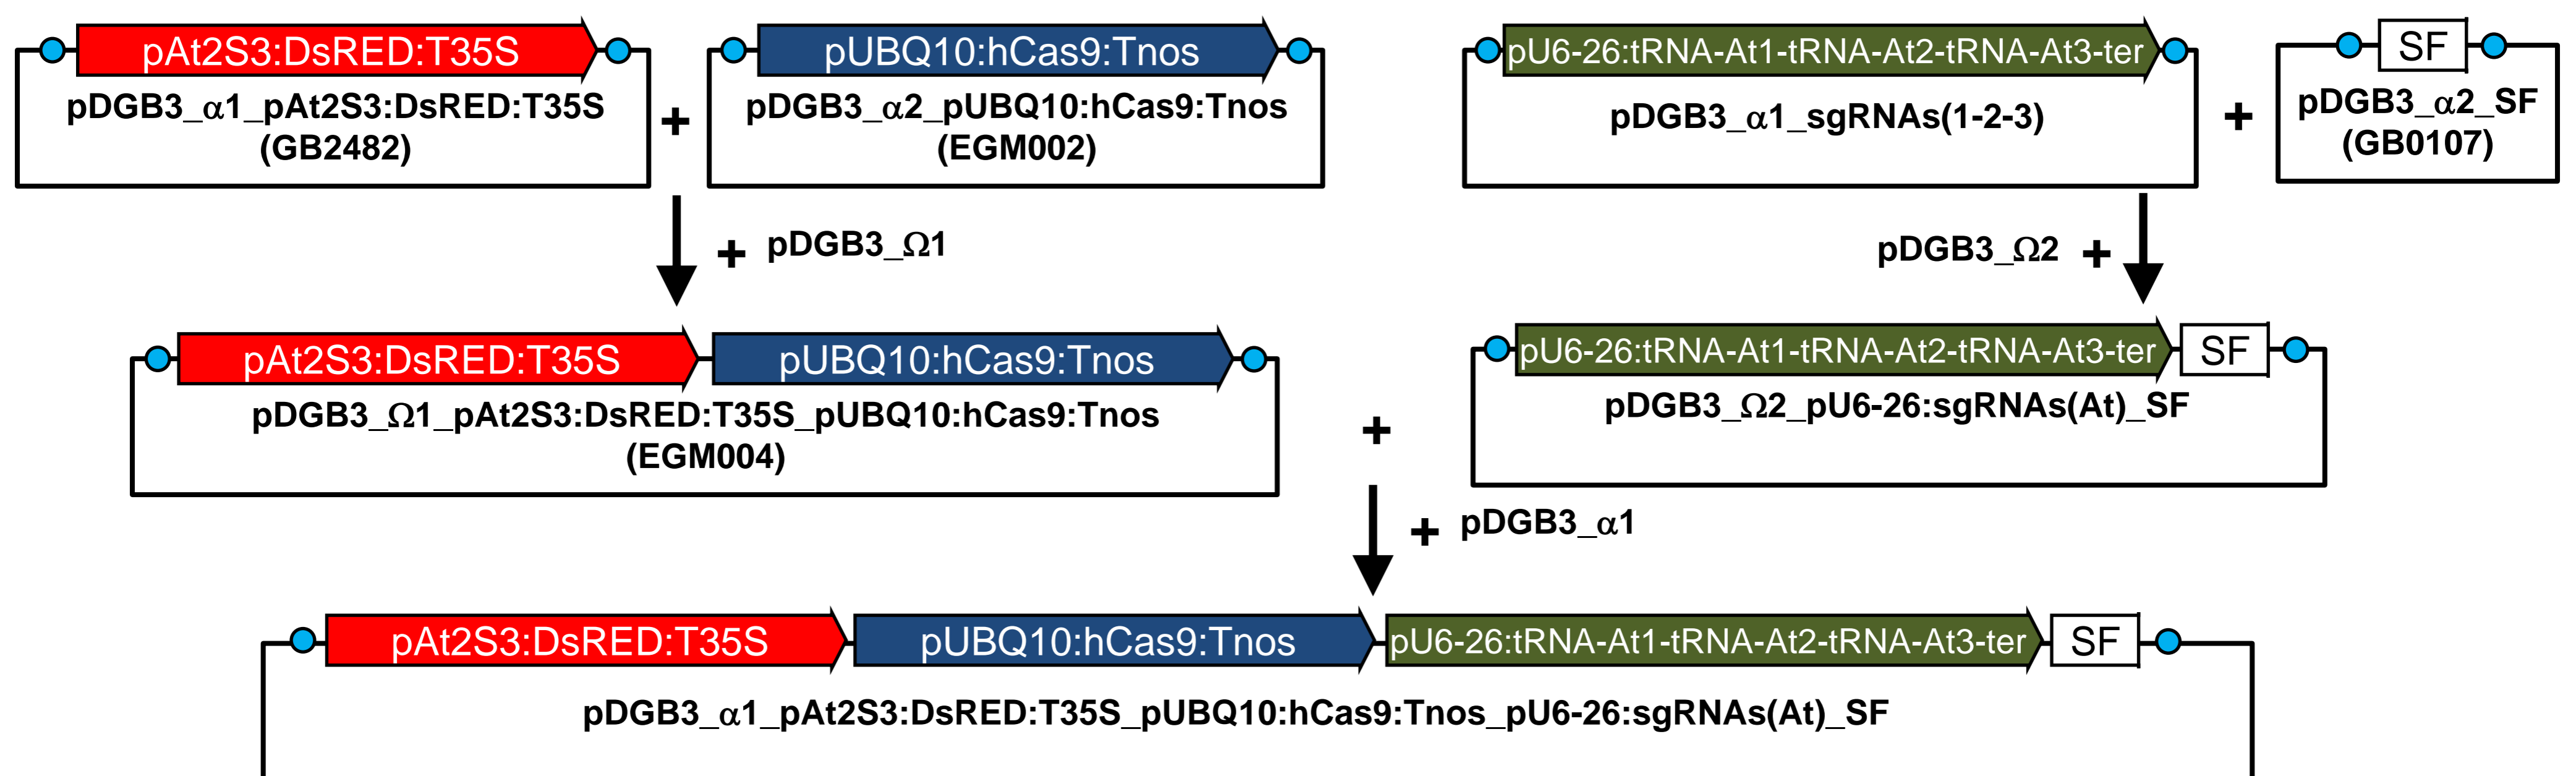

### Solanum lycopersicum Cloning Strategy

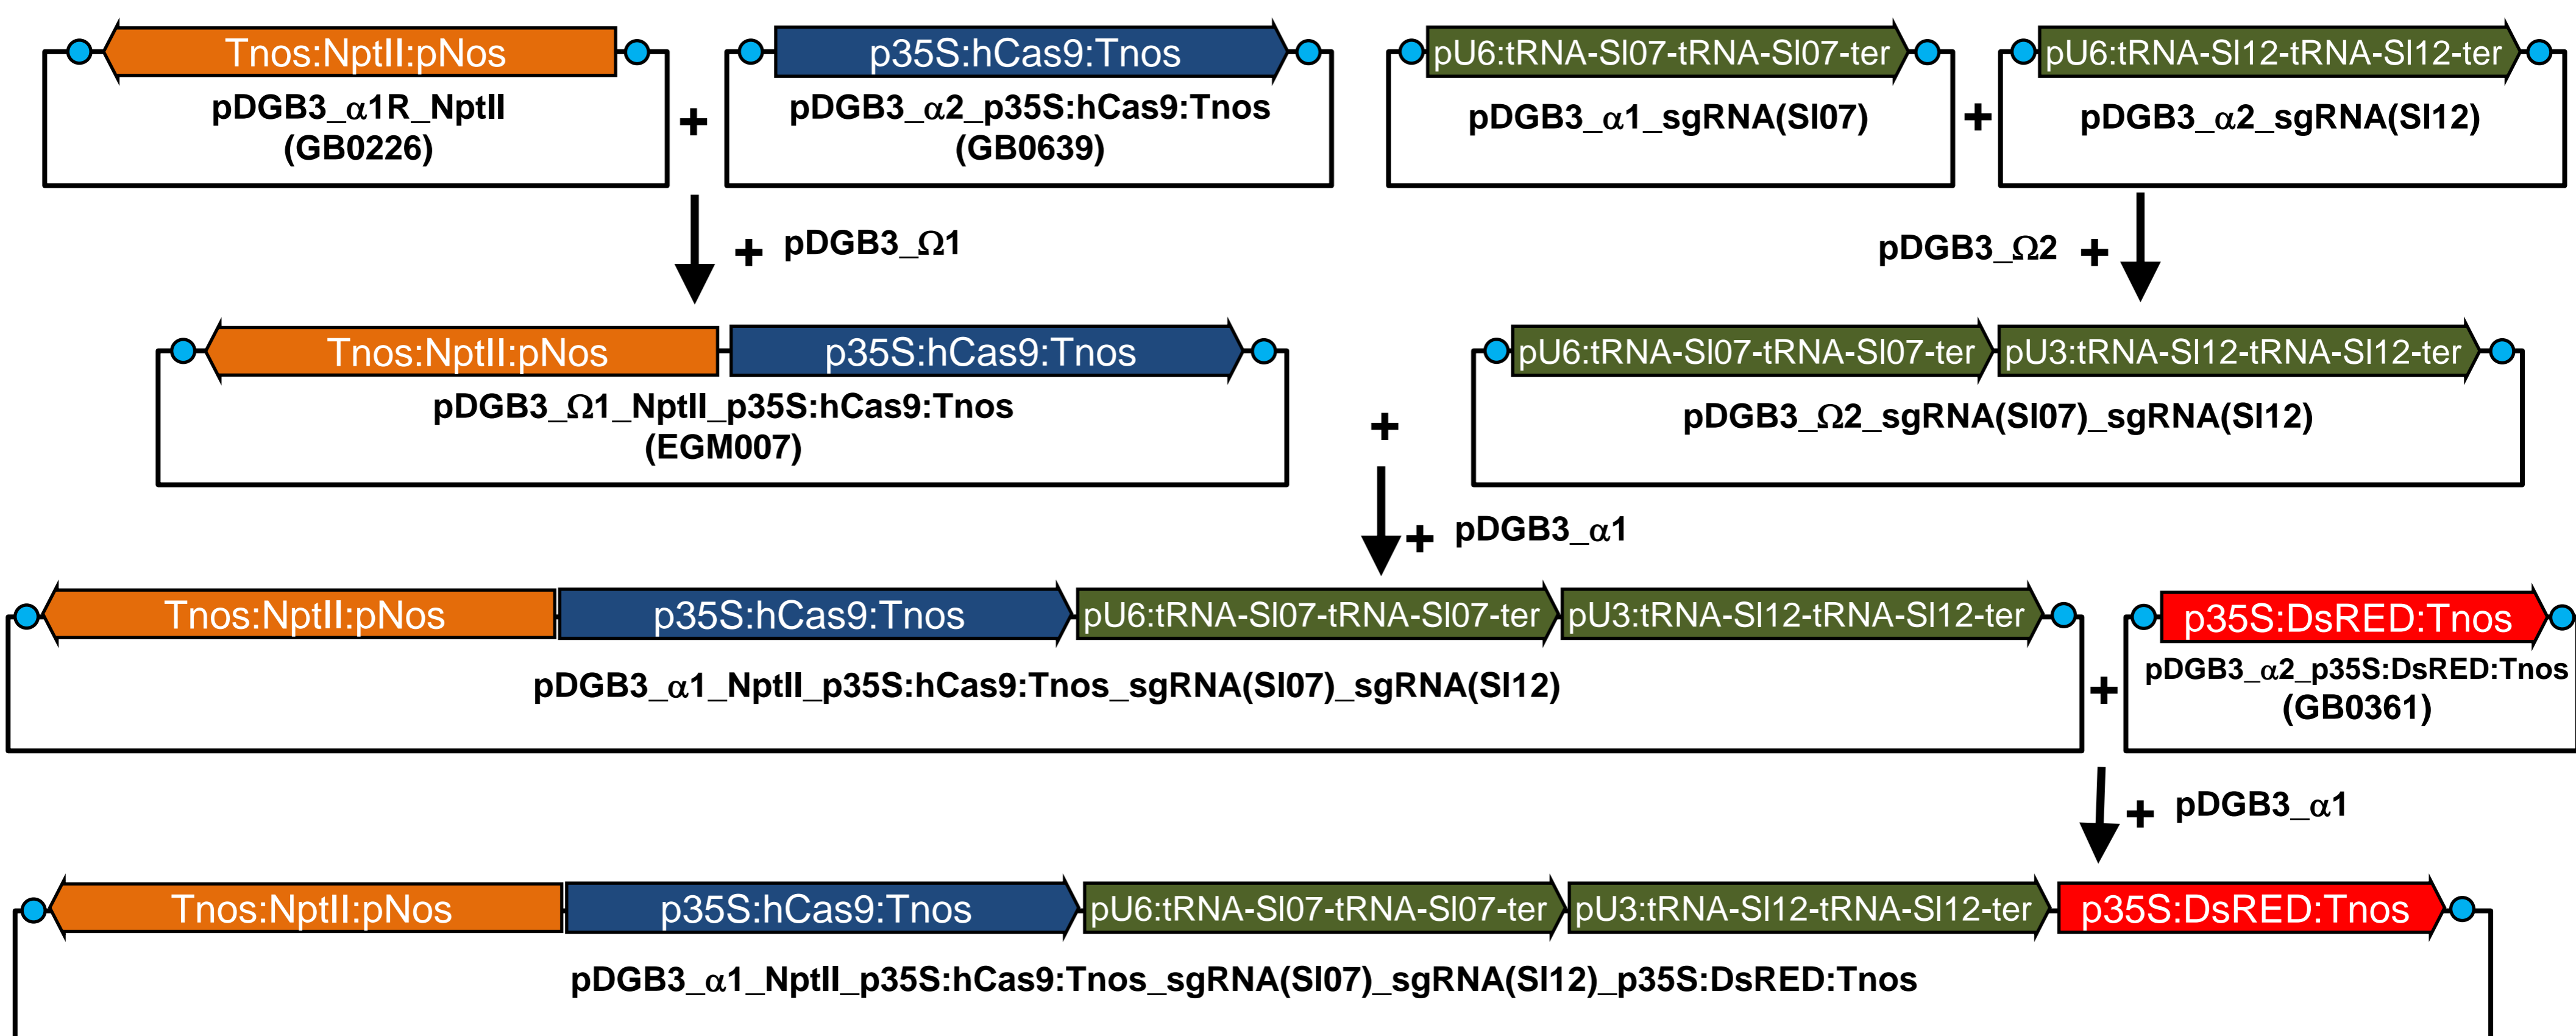

**Supplemental Figure 3.** Sequential steps to assemble all transcriptional units needed for each final vector for plant transformation.



Rice Line 1

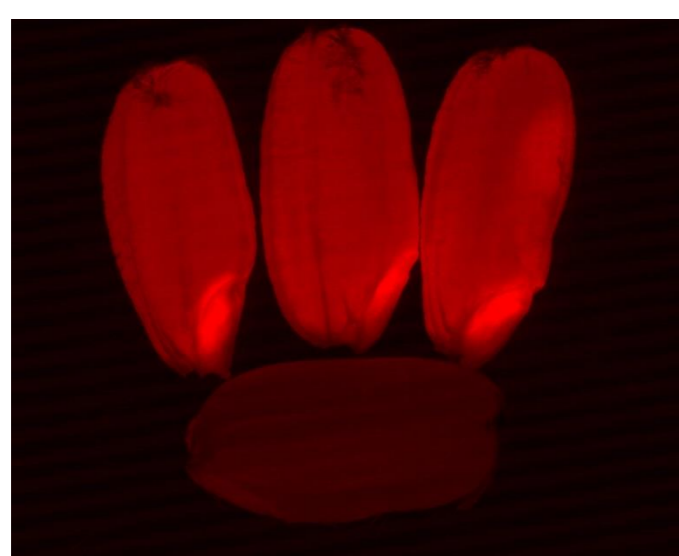

Rice Line 3

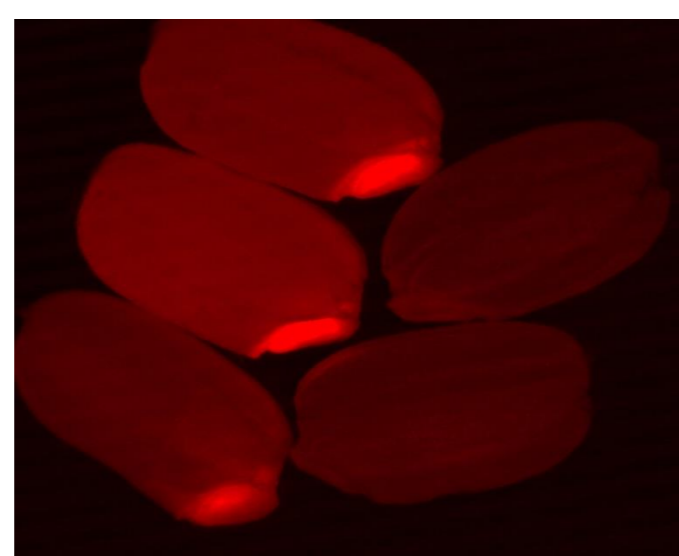

Rice Line 4

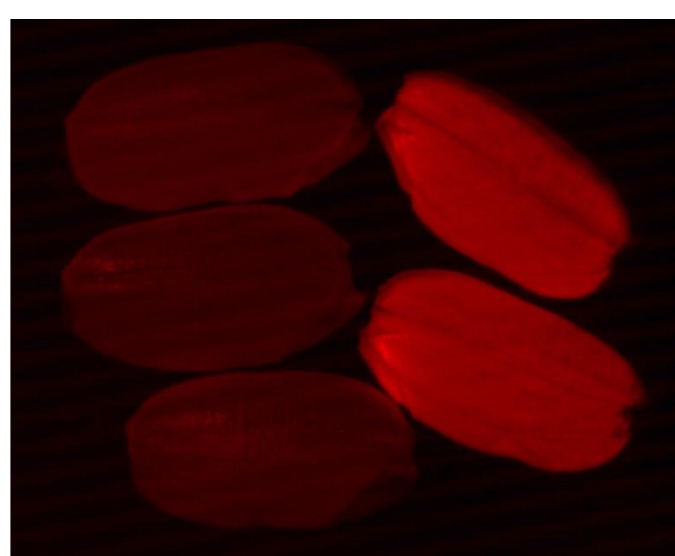

Rice Line 5

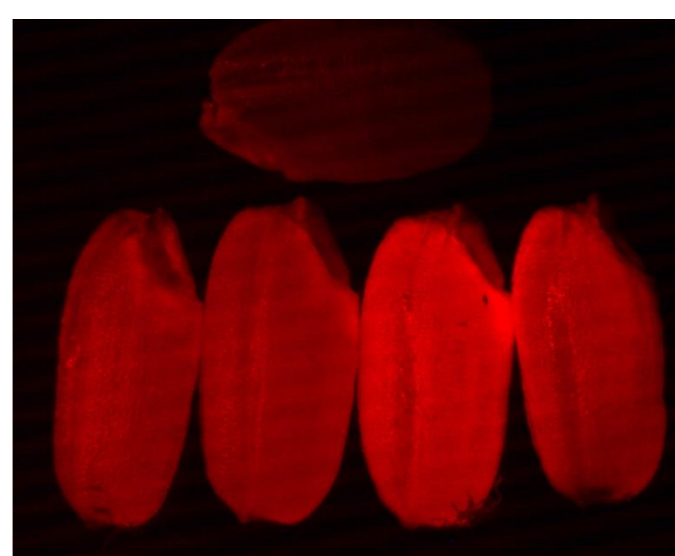

Rice Line 8

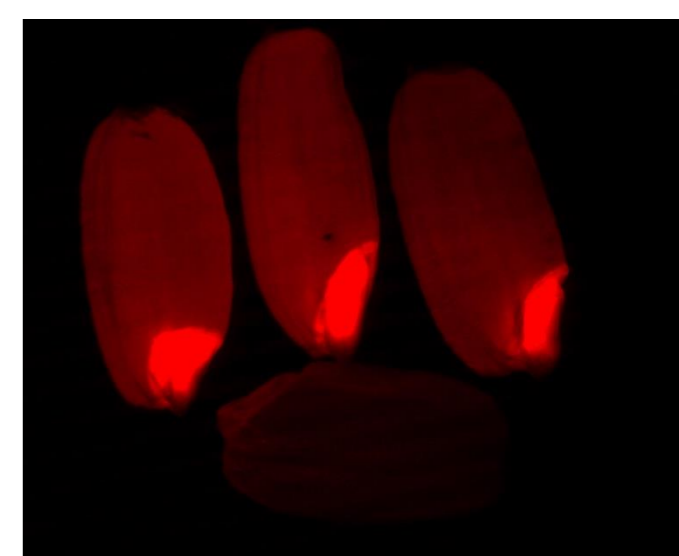

Rice Line 14

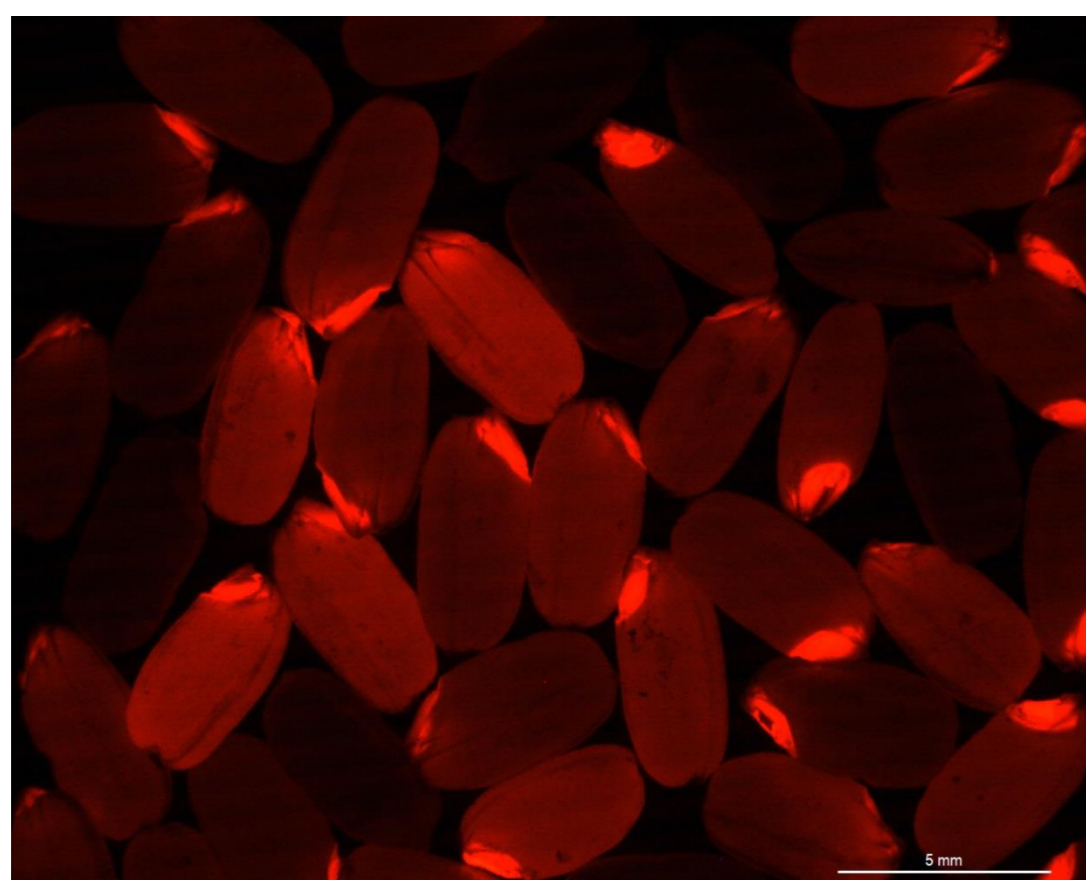

Rice Line 16

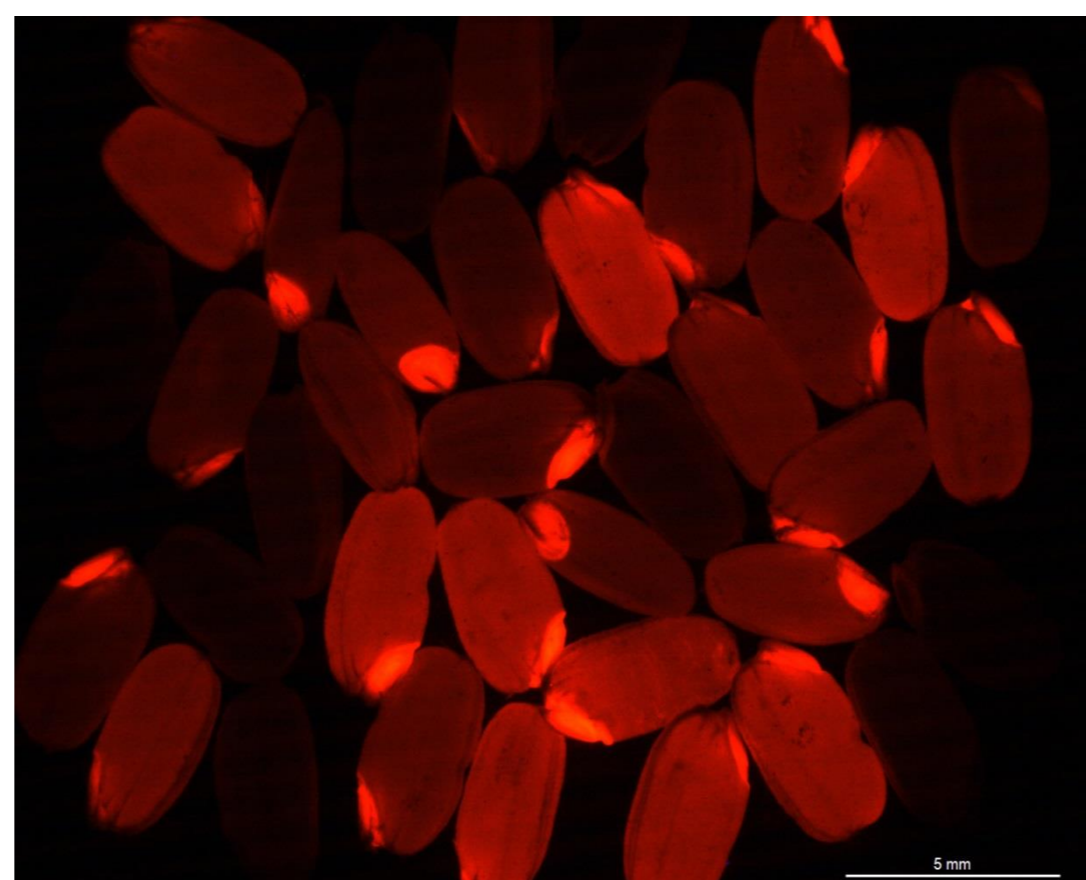

Rice Line 18

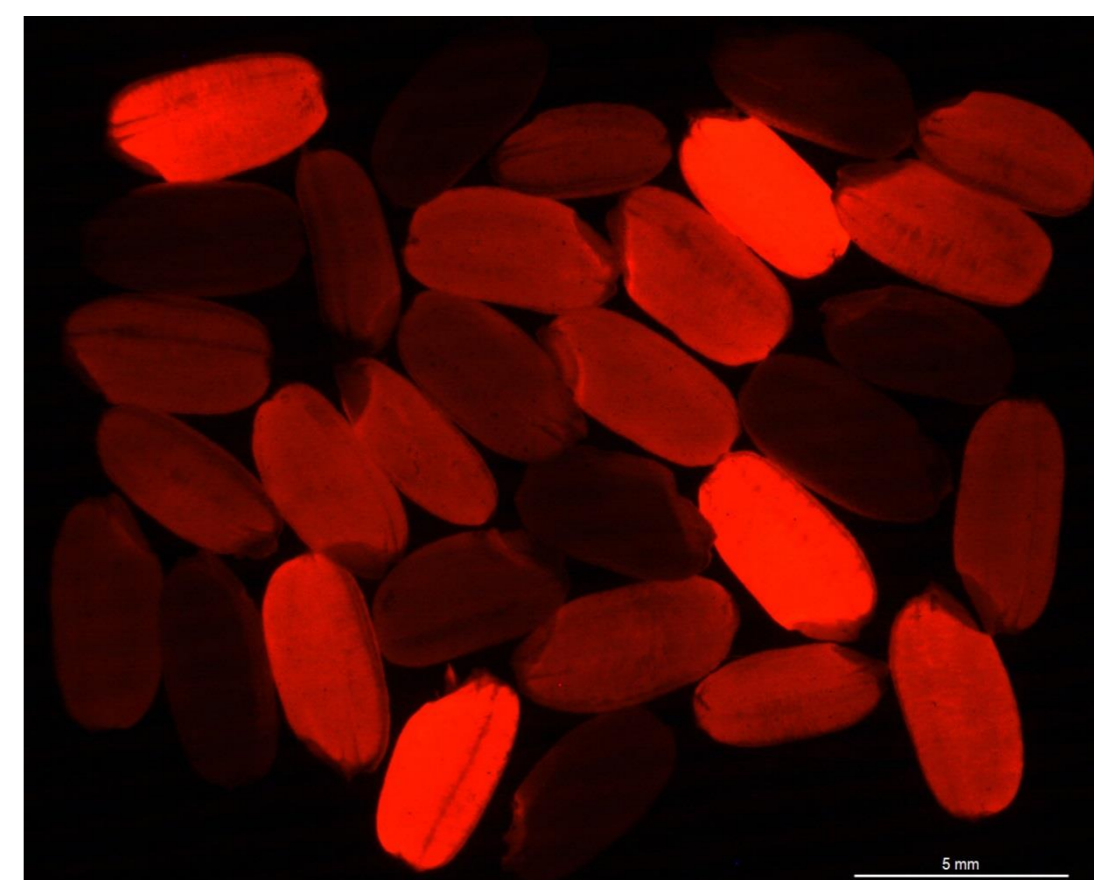

Tomato Line 4

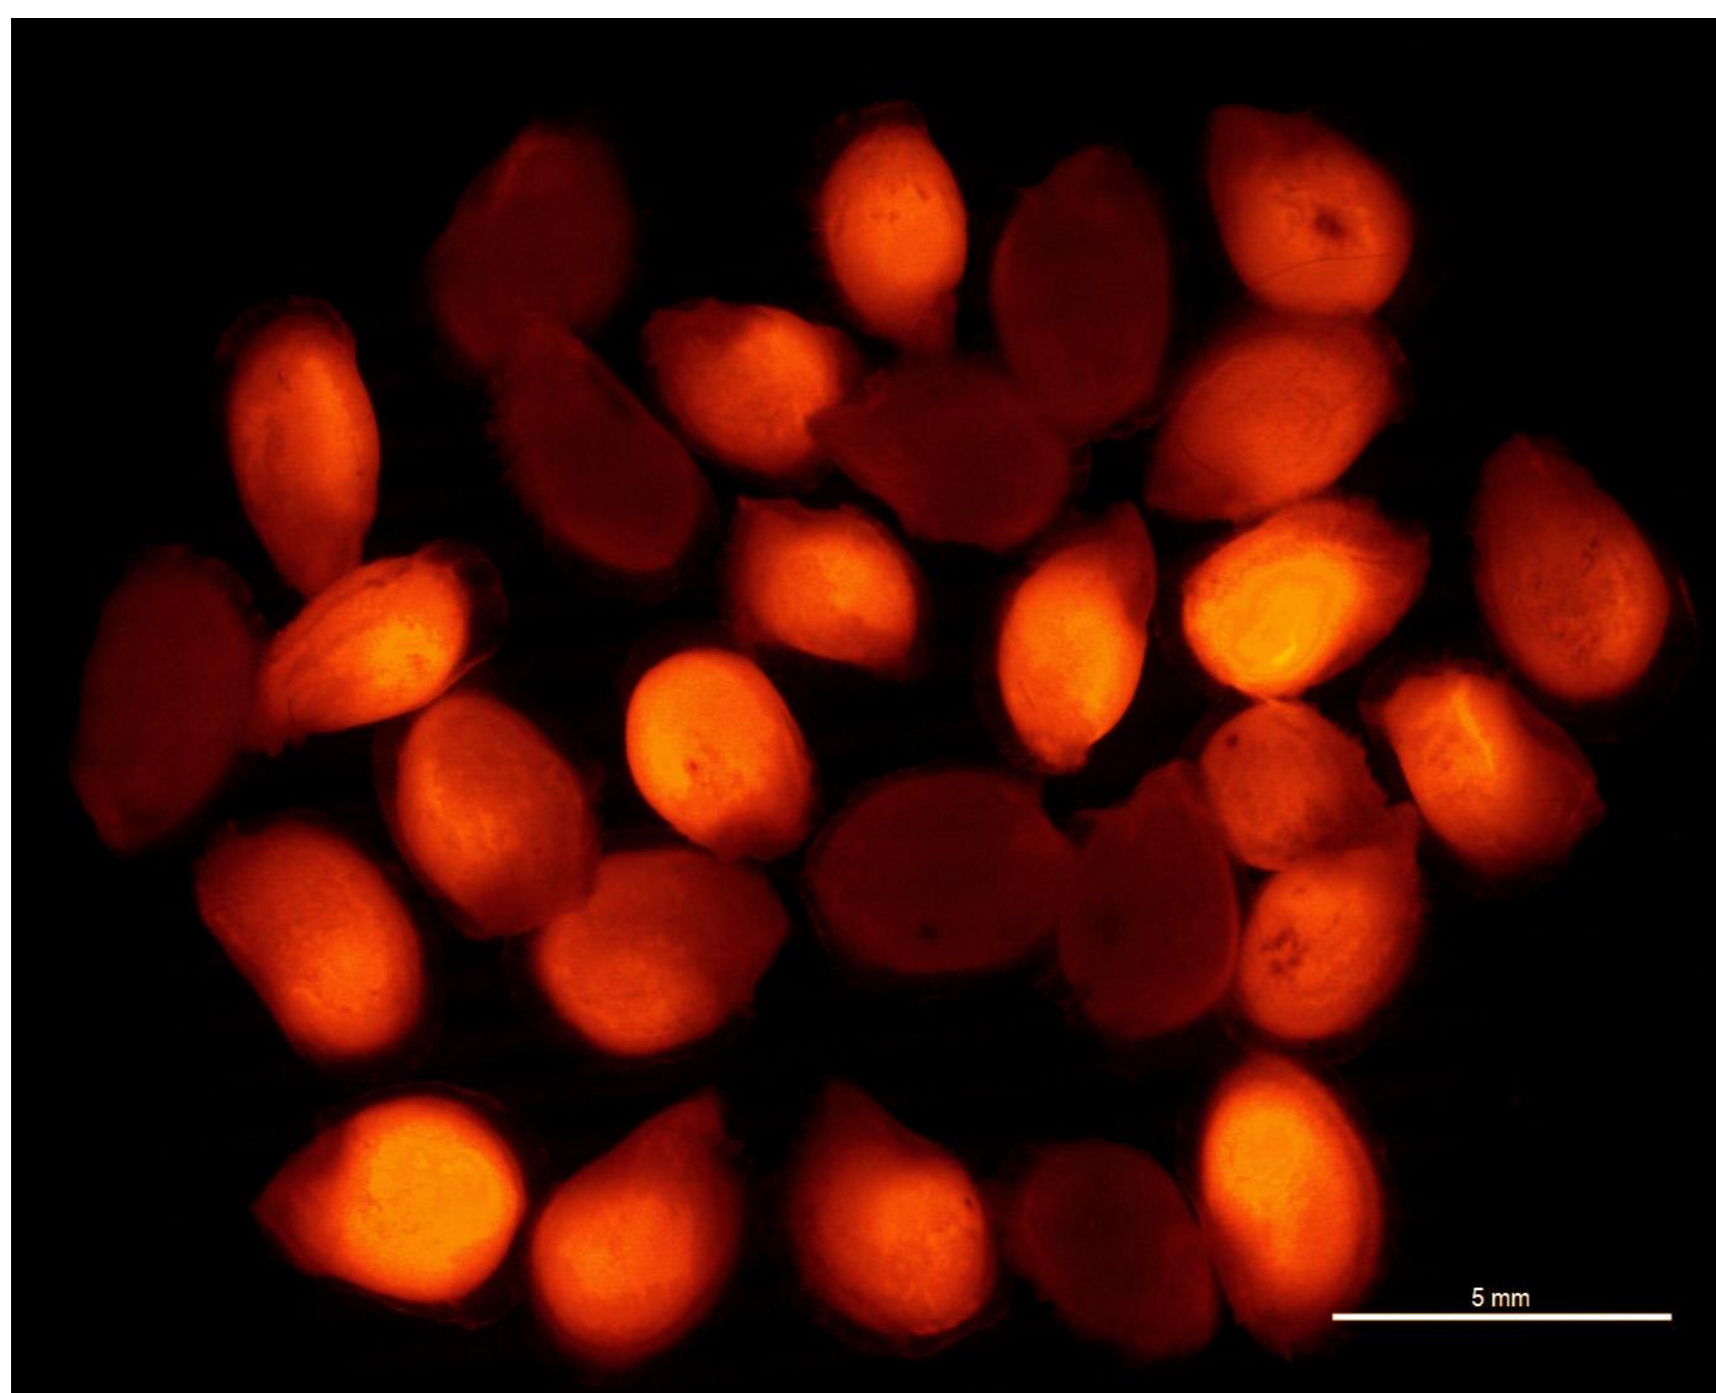

Tomato Line 6

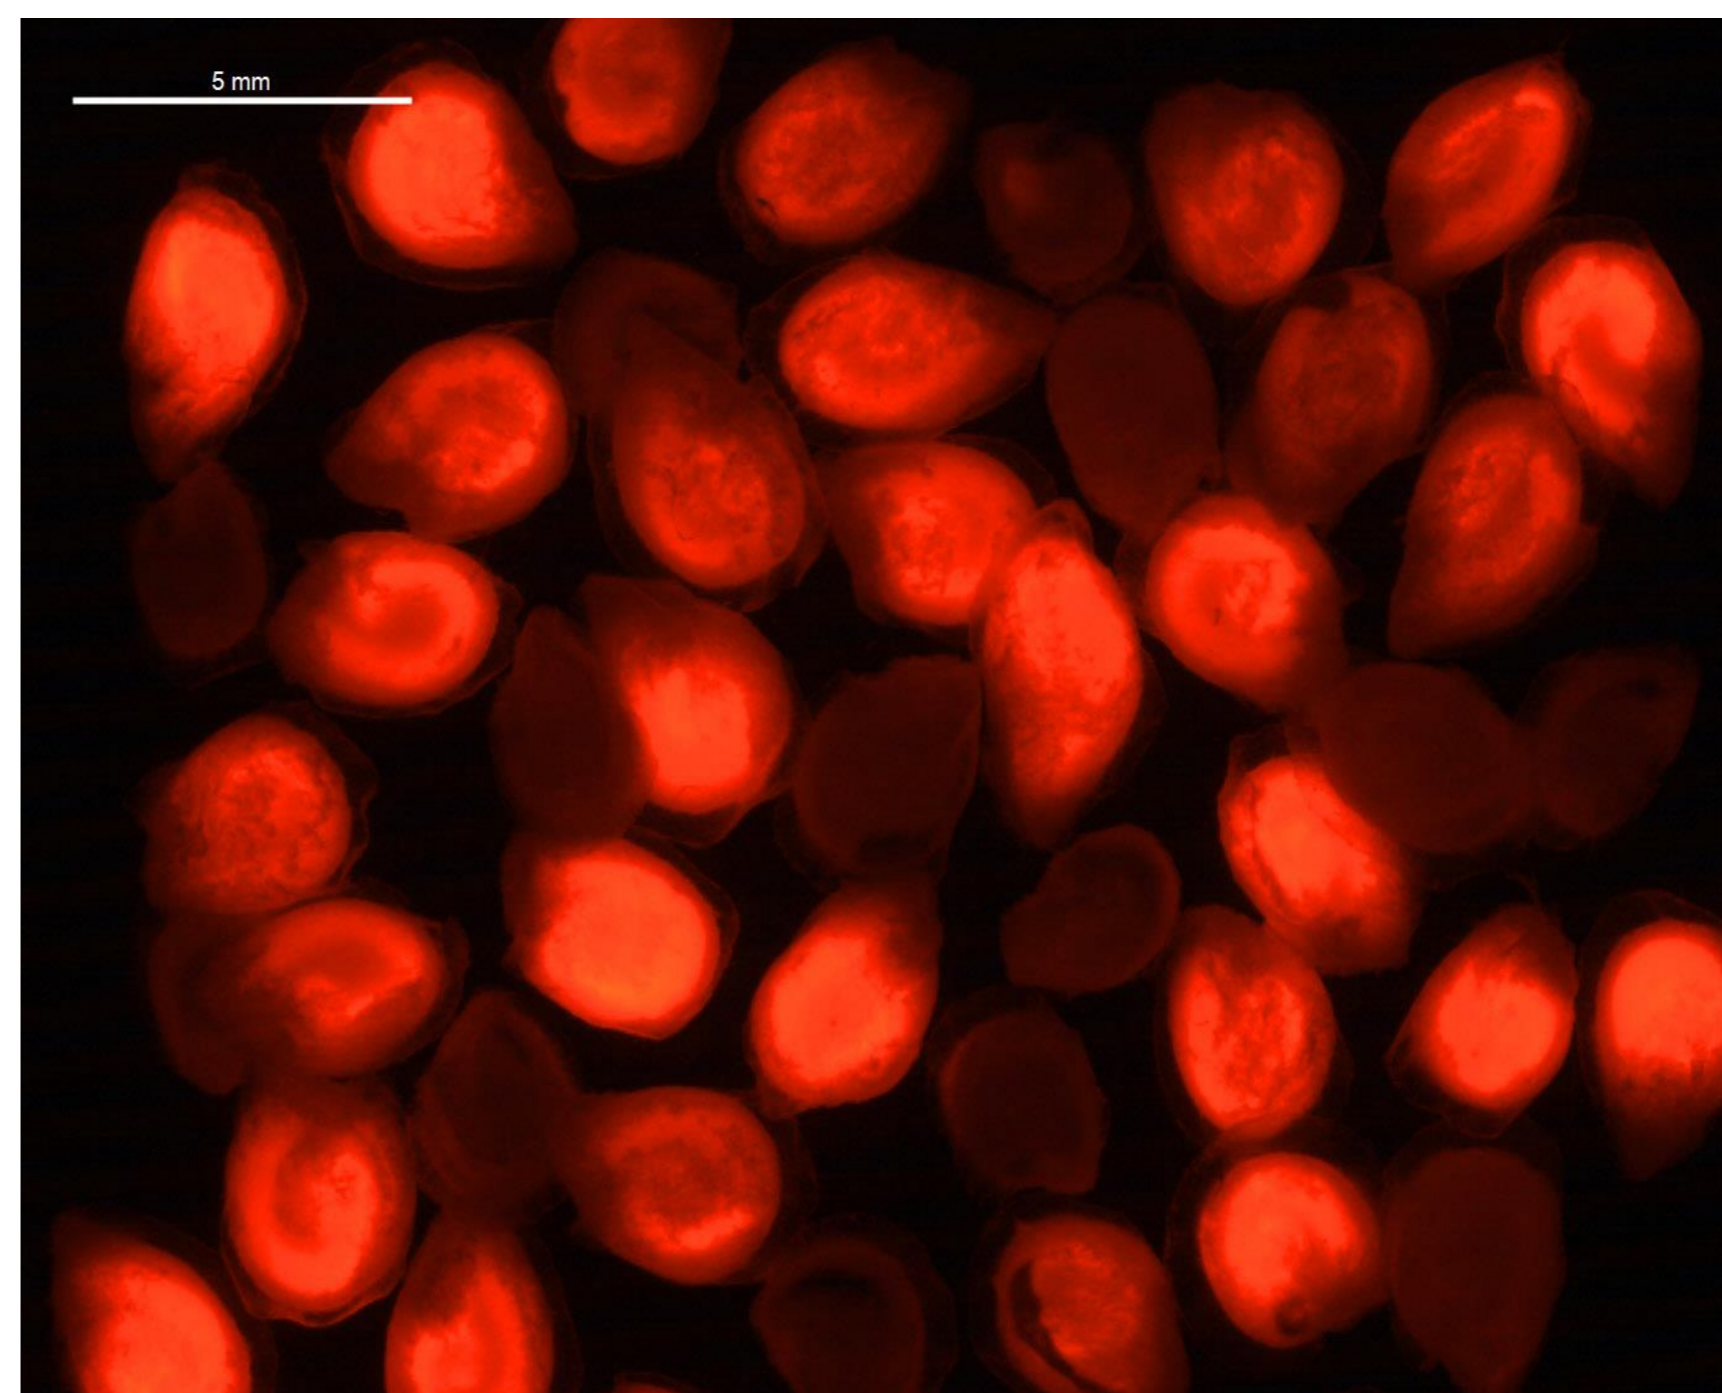

**Supplemental Figure 4.** DsRED signal in T2 segregants seeds from different independent lines of rice and tomato. We observed a similar embryo homogeneous pattern of DsRED signal in all tomato lines. In rice, DsRED signal can be observed in embryo and/or endosperm, and we have observed differences in the pattern of DsRED signal in different lines.



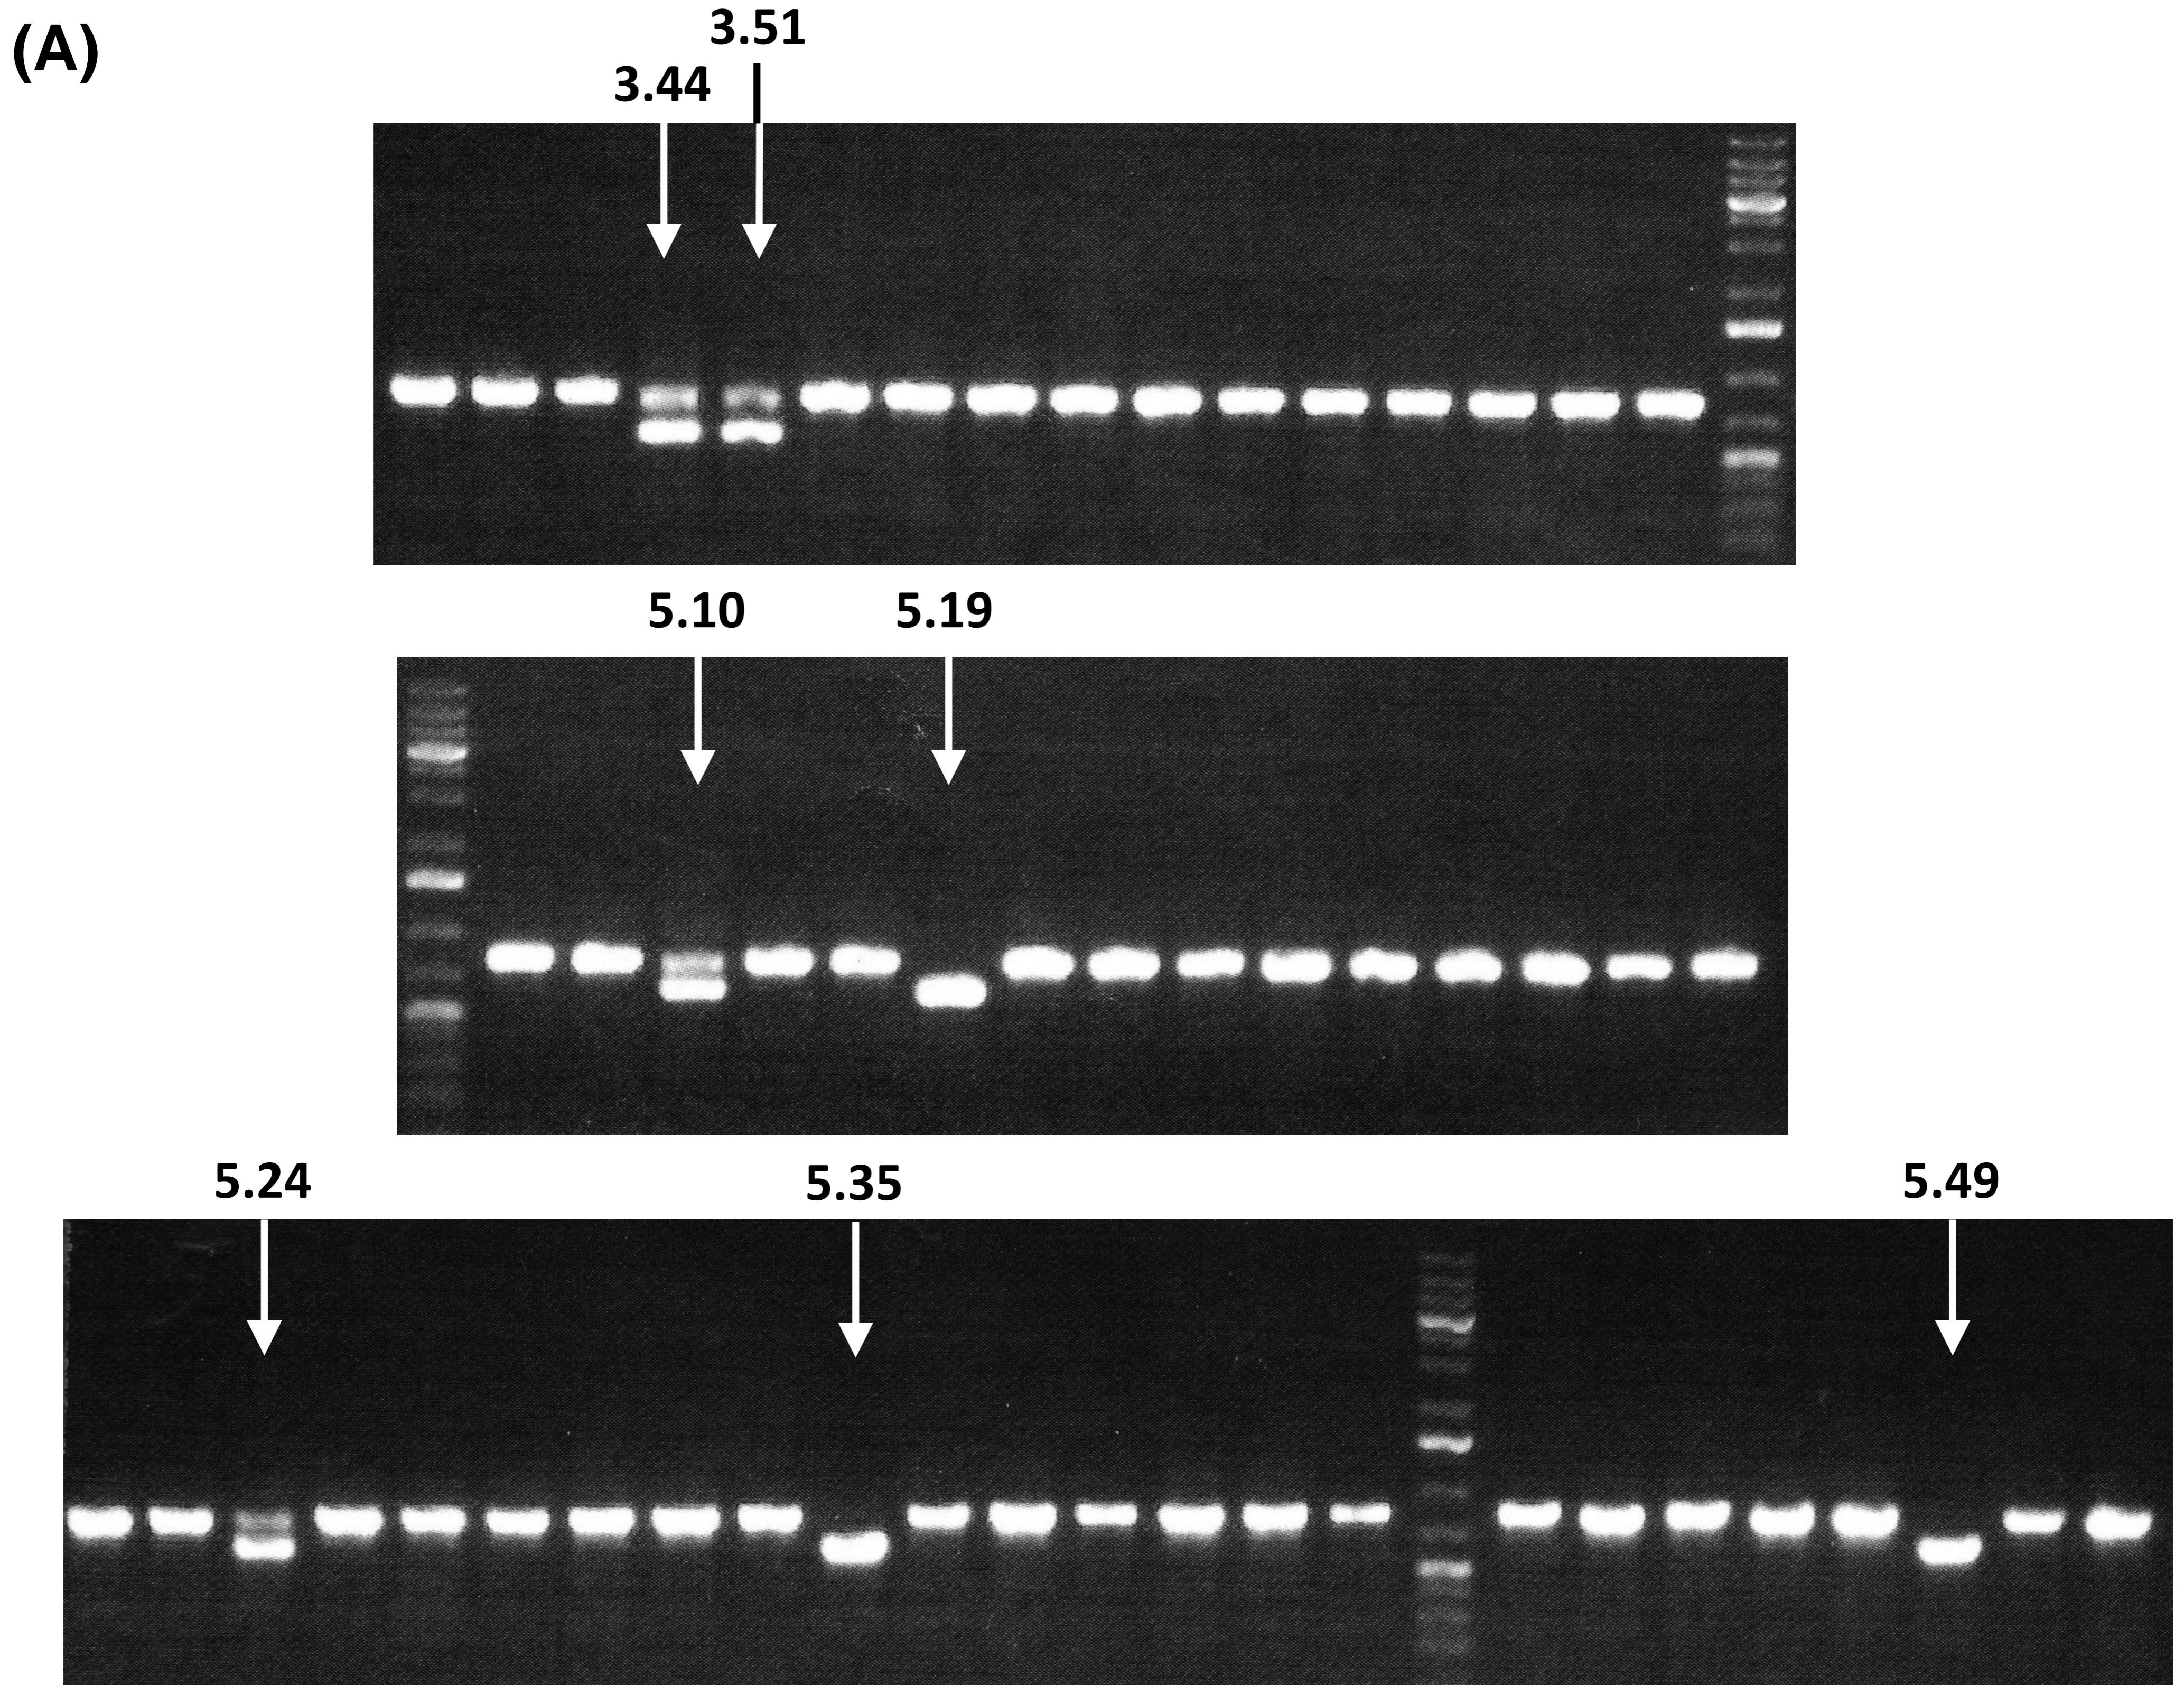

**(B)**

Target 1

wt TGT TTTTGCATGAATAATCAGTATATACAAAATATGTACGCAATGGCACATTTAATAATATGTTTCCCATTCAACTAAATTCATACATTTAT  
del193 TGT TTTTGCATGAATAATCAGTATATACAAAATATGTACGCAATGGCACATTTAATAATATGTTTCCCATTCAACTAAATTCATACATTTAT  
del240 TGT TTTTGCATG-----

wt CATTTCATCTCTTTGTCCTCTTTTCCTATATATATATGTGTCGTCCTCGAGCTTGTCTCATTACAAAAAGAAGGTGTAGAGAAAGTTAAAGA  
del193 CATTTCATCTCTTTGTCCTCTTTTCCTATATATATATGTGTCGTCCTCGAGCTTGTCTCATTACAAAAAGAAGGTGTAGAGAAAGTTAAAGA  
del240 -----

Target 2

Target 3

wt GAGAAGGAGAGATCCATAGAGAAAGAGAAAGAGAATGGGTTCTAAGGGAGACAACGTTGCTGTATGTAACATGAAGCTCGAGAGACTTCTCAG  
del193 GAGAAGGAGAGATCCATAGAGAAAGAGAAAGAGAATGGGTTCTA-----TGGATC-----  
del240 -----TAACATGAAGCTCGAGAGACTTCTCAG

wt CATGAAAGGTGGCAAAGGACAAGACAGCTACGCCAATAACTCTCAAGCTCAGGTCTGTACATCTTATTTTTTTTTTTCTAATTACTTAAAAGTT  
del193 -----  
del240 CATGAAAGGTGGCAAAGGACAAGACAGCTACGCCAATAACTCTCAAGCTCAGGTCTGTACATCTTATTTTTTTTTTTCTAATTACTTAAAAGTT

wt CCATTAAAAAGCCTTCTTATTATTCTATTTTCTATATCTCGAGTGATAAATTTGGGAATTTTAAGTGAAGGGACTGTGCTCAAGATTGGCAAG  
del193 -----TTGGGAATTTTAAGTGAAGGGACTGTGCTCAAGATTGGCAAG  
del240 CCATTAAAAAGCCTTCTTATTATTCTATTTTCTATATCTCGAGTGATAAATTTGGGAATTTTAAGTGAAGGGACTGTGCTCAAGATTGGCAAG

**Supplemental Figure 5.** A) Detection of big deletions in Arabidopsis. Agarose electrophoresis of PCR amplification of *IAMT1* sgRNA target genomic region from T2 plants of *Arabidopsis* lines 3 (del240) and 5 (del193). White arrows mark the lanes showing a lower size band, indicating the presence of a big deletion. In a few cases a double band is observed, which indicates an heterozygous individual for the deletion. B) Sequence alignment of deletions "del193" and "del240". In red 5'UTR, in blue first exon, in light green first intron and deleted sequence is indicated with dark green dashes. In del193 6 nucleotides "TGGATC" (in orange) are inserted between deletion limits that did not correspond with anything in deleted sequence though interestingly it corresponds with a sequence in the 5'UTR but in inverted orientation (orange line). CRISPR targets are indicated by red lines and PAM with green line.



**Supplemental Table 1.** Selected CRISPR target sequences.

| Gene                 | Target   | Sequence - PAM           |
|----------------------|----------|--------------------------|
| At IAMT1 (At5g55250) | sgRNA-1  | TGTATGAATTTAGTTGAATG GGG |
| At IAMT1 (At5g55250) | sgRNA-2  | AGAAAGAGAATGGGTTCTAA GGG |
| At IAMT1 (At5g55250) | sgRNA-3  | GAGAGACTTCTCAGCATGAA AGG |
| Solyc07g64990        | sgRNA-07 | AGCCACCGGACAAGAGCCGC CGG |
| Solyc12g14500        | sgRNA-12 | AATCAGCTGCACTCCGTCAA GGG |
| Os04g56950           | sgRNA-04 | TCACTTTCTGGAGGAGACAC TGG |

**Supplemental Table 2.** GB parts generated in this study. Sequences are accessible at GB cloning website using the GB database ID.

| <b>Gbparts generated in this study</b> |                                                 |                 |
|----------------------------------------|-------------------------------------------------|-----------------|
| <b>GB database ID</b>                  | <b>Name</b>                                     | <b>Category</b> |
| EGM001                                 | <i>Zea Mays</i> UBQ promoter                    | PROM+5'UTR      |
| EGM002                                 | pAtUBQ10::hCas9::Tnos                           | TU              |
| EGM003                                 | pZmUBQ::hCas9::Tnos                             | TU              |
| EGM004                                 | pAt2S3::DsRED::T35S<br>pAtUBQ10::hCas9::Tnos    | MODULE          |
| EGM005                                 | pAt2S3::DsRED::T35S<br>pAtUBQ10::hCas9::Tnos_SF | MODULE          |
| EGM006                                 | Tnos:Hygromycin:pNos<br>pZmUBQ:hCAS9:Tnos       | MODULE          |
| EGM007                                 | NptII(Kan <sup>R</sup> )_p35S:hCas9Tnos         | MODULE          |

**Supplemental Table 3.** GB parts used in this study. Sequences are accessible at GB cloning website using the GB database ID.

| <b>Gbparts used in this study</b> |                              |                         |
|-----------------------------------|------------------------------|-------------------------|
| <b>GB database ID</b>             | <b>Name</b>                  | <b>Category</b>         |
| GB0030                            | <i>CaMV 35S</i>              | PROM+5'UTR              |
| GB0037                            | <i>Tnos</i>                  | 3'UTR+TERM              |
| GB1041                            | <i>hCas9</i>                 | CDS                     |
| GB1001                            | pAtU6-26 (PROM DPolIII)      | PROM                    |
| GB1184                            | pOsU3 (PROM MPolIII)         | PROM                    |
| GB2478                            | <i>A.thaliana UBQ10</i>      | PROM+5UTR               |
| GB1205                            | tRNA-gRNA position [D1_2]    | Multiplexing (level -1) |
| GB1206                            | tRNA-gRNA position [2_3]     | Multiplexing (level -1) |
| GB1207                            | tRNA-gRNA position [3F]      | Multiplexing (level -1) |
| GB1208                            | tRNA-gRNA position [D1_3]    | Multiplexing (level -1) |
| GB1209                            | tRNA-gRNA position [M1_2]    | Multiplexing (level -1) |
| GB1210                            | tRNA-gRNA position [M1_3]    | Multiplexing (level -1) |
| GB0107                            | pCambia_a2_SF                | TU                      |
| GB0211                            | Hygromycin resistance        | TU                      |
| GB0226                            | Kanamycin resistance (NptII) | TU                      |
| GB0361                            | <i>p35S::DsRED::Tnos</i>     | TU                      |
| GB0639                            | <i>p35S::hCas9::Tnos</i>     | TU                      |
| GB2482                            | <i>pAt2S3::DsRED::T35S</i>   | TU                      |



**Supplemental Table 4.** Primers used in this work.

| <b>Primer</b>      | <b>Sequence</b>                       |
|--------------------|---------------------------------------|
| GB_PromZmUBIQ_for1 | GCCGTCTCGCTCGGGAGGCATGCCTGCAGTGCAGCGT |
| GB_ZmUBIQ_rev1     | GCCGTCTCGCTCACATTGTGAAGGGGGCGGCCGCGGA |
| sgRNA-At1-F        | GTGCAGAGAGACTTCTCAGCATGAA             |
| sgRNA-At1-R        | AAACTTCATGCTGAGAAGTCTCTCT             |
| sgRNA-At2-F        | GTGCAAGAAAGAGAATGGGTCTCTAA            |
| sgRNA-At2-R        | AAACTTAGAACCCATTCTCTTTCTT             |
| sgRNA-At3-F        | GTGCATGTATGAATTTAGTTGAATG             |
| sgRNA-At3-R        | AAACCATTCAACTAAATTCATACAT             |
| sgRNA-Sl07-F       | GTGCAAGCCACCGGACAAGAGCCGC             |
| sgRNA-Sl07-R       | AAACGCGGCTCTTGTCCGGTGGCTT             |
| sgRNA-Sl12-F       | GTGCAAATCAGCTGCACTCCGTCAA             |
| sgRNA-Sl12-R       | AAACTTGACGGAGTGCAGCTGATTT             |
| sgRNA-Os04-F       | GTGCATCACTTTCTGGAGGAGACAC             |
| sgRNA-Os04-R       | AAACGTGTCTCCTCCAGAAAGTGAT             |
| gAtIAMT1-F         | ACCTACAGTGCACAAAATGACA                |
| gAtIAMT1-R         | CTTGCCAATCTTGAGCACAGTC                |
| gSl07-64990_F      | TGGCACCTTTAGGAGACAATAATAACA           |
| gSl07-64990_R      | AACCAGGAACTCCGGCGGCGAAA               |
| gSl12-14500_F      | GCATGAAAGGAGGCAAAGGTGAAGC             |
| gSl12-14500_R      | CGCCGGGAATAGTCGCCGGTAAA               |
| Os04g56950_F       | GGATCTGAACTGAACCCTTGTGCT              |
| Os04g56950_R       | TTGCTGGGGAGGTCGGAGAA                  |
| g_hCas9_For        | GGCGGAGCAAGCCAGGAGGAA                 |
| g_hCas9_Rev        | CTTGACAGCCGCCCCCATCCT                 |



**Supplemental Table 5.** Genotype and mutations of the tomato T2 plants used in this work.

| <i>Solanum Lycopersicum</i> |           |               |          |           |          |               |            |          |             |
|-----------------------------|-----------|---------------|----------|-----------|----------|---------------|------------|----------|-------------|
| Line                        | Plant     | Solyc07g64990 |          |           |          | Solyc12g14500 |            |          |             |
|                             |           | Genotype      |          | Mutation  | Genotype |               | Mutation   |          |             |
| 1                           | 1         |               |          | wt        |          | Mut. hom      |            |          | del4        |
|                             | 2         |               |          | wt        |          |               | bi-allelic |          | del4/+1(T)  |
|                             | 3         |               |          | wt        |          | Mut. hom      |            |          | del4        |
|                             | 4         |               |          | wt        |          | Mut. hom      |            |          | del4        |
|                             | 5         |               |          | wt        |          |               | bi-allelic |          | del4/+1(T)  |
|                             | 6         |               |          | wt        |          |               | bi-allelic |          | del4/+1(T)  |
|                             | 7         |               |          | wt        |          |               | bi-allelic |          | del4/+1(T)  |
|                             | 8         |               |          | wt        |          |               | bi-allelic |          | del4/+1(T)  |
| 3                           | 1         |               | het      |           | wt/del3  |               | bi-allelic |          | -1(A)/-1(C) |
|                             | 2         |               | het      |           | wt/del3  |               | bi-allelic |          | -1(A)/-1(C) |
|                             | 3         |               |          | wt        |          | Mut. hom      |            |          | -1(A)       |
|                             | 4         |               |          | wt        |          | Mut. hom      |            |          | -1(A)       |
|                             | 5         |               | het      |           | wt/del3  |               | bi-allelic |          | -1(A)/-1(C) |
|                             | 6         |               |          | wt        |          |               | bi-allelic |          | -1(A)/-1(C) |
|                             | 7         | Mut. Hom      |          |           | del3     | Mut. hom      |            |          | -1(A)       |
|                             | 8         | Mut. hom      |          |           | del3     | Mut. hom      |            |          | -1(C)       |
| 4                           | 1         |               |          | wt        |          | Mut. hom      |            |          | -1(A)       |
|                             | 2         |               |          | wt        |          | Mut. hom      |            |          | del6        |
|                             | 3         |               |          | wt        |          |               | bi-allelic |          | del6/-1(A)  |
|                             | 4         |               |          | wt        |          |               | bi-allelic |          | del6/-1(A)  |
|                             | 5         |               |          | wt        |          | Mut. hom      |            |          | del6        |
|                             | 6         |               |          | wt        |          | Mut. hom      |            |          | -1(A)       |
|                             | 7         |               |          | wt        |          |               | bi-allelic |          | del6/-1(A)  |
| 6                           | 1         |               |          | wt        |          |               |            | wt       |             |
|                             | 2         |               |          | wt        |          |               |            | wt       |             |
|                             | 3         |               |          | wt        |          |               |            | wt       |             |
|                             | 4         |               |          | wt        |          |               |            | wt       |             |
|                             | 5         |               |          | wt        |          |               |            | wt       |             |
|                             | 6         |               |          | wt        |          |               |            | wt       |             |
| <b>Total</b>                | <b>29</b> | <b>2</b>      | <b>3</b> | <b>24</b> |          | <b>11</b>     | <b>12</b>  | <b>6</b> |             |



**Supplemental Table 6.** Genotype and mutations of the rice T2 plants used in this work.

| <i>Oryza sativa</i> (Os04g56950) |           |           |          |            |          |              |
|----------------------------------|-----------|-----------|----------|------------|----------|--------------|
| Line                             | Plant     | Genotype  |          |            |          | Mutation     |
| 1                                | 1         | Mut. hom  |          |            |          | -1(A)        |
|                                  | 2         |           |          | bi-allelic |          | -1(A)/-1(C)  |
| 3                                | 1         |           |          | bi-allelic |          | -1(A)/+1(G)  |
|                                  | 2         | Mut. hom  |          |            |          | +A           |
| 4                                | 1         | Mut. hom  |          |            |          | +A           |
|                                  | 2         | Mut. hom  |          |            |          | +A           |
|                                  | 3         | Mut. hom  |          |            |          | +A           |
| 5                                | 1         | Mut. hom  |          |            |          | +A           |
|                                  | 2         |           |          | bi-allelic |          | +A/+T        |
|                                  | 3         | Mut. hom  |          |            |          | +A           |
| 6                                | 1         |           |          | bi-allelic |          | +A/+T        |
|                                  | 2         | Mut. hom  |          |            |          | +A           |
|                                  | 3         | Mut. hom  |          |            |          | +T           |
| 8                                | 1         |           |          | bi-allelic |          | +G/+C        |
| 9                                | 1         | Mut. hom  |          |            |          | +G           |
|                                  | 2         | Mut. hom  |          |            |          | +C           |
|                                  | 3         | Mut. hom  |          |            |          | +A           |
| 10                               | 1         | Mut. hom  |          |            |          | +A           |
|                                  | 2         | Mut. hom  |          |            |          | +A           |
|                                  | 3         | Mut. hom  |          |            |          | -2(CA)       |
| 12                               | 1         |           |          | bi-allelic |          | -1(A)/-2(GA) |
| 14                               | 1         |           |          | bi-allelic |          | -1(A)/-2(GA) |
|                                  | 2         | Mut. hom  |          |            |          | -2(GA)       |
|                                  | 3         |           |          | bi-allelic |          | +A/+T        |
| 16                               | 1         | Mut. hom  |          |            |          | "A" > "TT"   |
| 17                               | 1         | Mut. hom  |          |            |          | +A           |
| 18                               | 1         | Mut. hom  |          |            |          | +A           |
|                                  | 3         |           |          |            | wt       |              |
| 20                               | 1         |           | het      |            |          | wt/-2(GA)    |
|                                  | 2         |           | het      |            |          | wt/+A        |
|                                  | 3         | Mut. hom  |          |            |          | +G           |
| <b>Total</b>                     | <b>31</b> | <b>20</b> | <b>2</b> | <b>8</b>   | <b>1</b> |              |



**Supplemental Table 7.** Genotype and mutations of the arabidopsis T2 plants from Line 1 used in this work.

| <i>Arabidopsis thaliana</i> (At5g55250) |           |          |          |           |          |          |          |           |       |          |                         |           |    |          |          |           |
|-----------------------------------------|-----------|----------|----------|-----------|----------|----------|----------|-----------|-------|----------|-------------------------|-----------|----|----------|----------|-----------|
| Line                                    | Plant     | Target 1 |          |           | Target 2 |          |          | Target 3  |       |          | Genomic Region Genotype |           |    |          |          |           |
|                                         |           | Genotype |          | Mutation  | Genotype |          | Mutation | Genotype  |       | Mutation | Genomic Region Genotype |           |    |          |          |           |
| 1                                       | 2         |          |          | wt        |          |          | wt       |           |       |          | wt                      |           |    | wt       |          |           |
|                                         | 3         |          |          | wt        |          | Mut. hom |          |           | +1(C) |          |                         | wt        |    | Mut. hom |          |           |
|                                         | 4         |          |          | wt        |          |          |          | wt        |       |          |                         | wt        |    | wt       |          |           |
|                                         | 5         |          |          | wt        |          |          |          | wt        |       |          |                         | wt        |    | wt       |          |           |
|                                         | 6         |          |          | wt        |          |          | het      |           |       | wt/+1(T) |                         | het       |    | wt/-1(A) |          |           |
|                                         | 7         |          |          | wt        |          | Mut. hom |          |           |       | +1(A)    |                         |           | wt |          | Mut. hom |           |
|                                         | 9         |          |          | wt        |          | Mut. hom |          |           |       | +1(A)    |                         |           | wt |          | Mut. hom |           |
|                                         | 11        |          |          | wt        |          |          |          | wt        |       |          | Mut. hom                |           |    | +1(T)    | Mut. hom |           |
|                                         | 12        |          |          | wt        |          |          |          | wt        |       |          |                         |           | wt |          | wt       |           |
|                                         | 13        |          |          | wt        |          |          |          | wt        |       |          |                         |           | wt |          | wt       |           |
|                                         | 14        |          |          | wt        |          |          |          | wt        |       |          |                         |           | wt |          | wt       |           |
|                                         | 15        |          |          | wt        |          |          |          | wt        |       |          |                         | het       |    | wt/+1(T) | het      |           |
|                                         | 16        |          |          | wt        |          |          |          | wt        |       |          |                         |           | wt |          | wt       |           |
|                                         | 18        |          |          | wt        |          |          |          | wt        |       |          | Mut. hom                |           |    | +1(T)    | Mut. hom |           |
|                                         | 19        |          |          | wt        |          |          |          | wt        |       |          |                         |           | wt |          | wt       |           |
|                                         | 20        |          |          | wt        |          |          |          | wt        |       |          |                         |           | wt |          | wt       |           |
|                                         | 21        |          |          | wt        |          |          |          | wt        |       |          |                         |           | wt |          | wt       |           |
|                                         | 22        |          |          | wt        |          |          |          | wt        |       |          |                         |           | wt |          | wt       |           |
|                                         | 25        |          |          | wt        |          |          |          | wt        |       |          |                         | het       |    | wt/+1(T) | het      |           |
|                                         | 28        |          |          | wt        |          |          |          | wt        |       |          |                         |           | wt |          | wt       |           |
|                                         | 29        |          |          | wt        |          |          |          | wt        |       |          |                         |           | wt |          | wt       |           |
|                                         | 30        |          |          | wt        |          |          |          | wt        |       |          |                         |           | wt |          | wt       |           |
|                                         | 31        |          |          | wt        |          |          |          | wt        |       |          | Mut. hom                |           |    | +1(T)    | Mut. hom |           |
|                                         | 32        |          |          | wt        |          |          |          | wt        |       |          |                         |           | wt |          | wt       |           |
|                                         | 34        |          |          | wt        |          |          |          | wt        |       |          |                         |           | wt |          | wt       |           |
|                                         | 35        |          |          | wt        |          |          |          | wt        |       |          |                         |           | wt |          | wt       |           |
|                                         | 36        |          |          | wt        |          |          |          | wt        |       |          |                         |           | wt |          | wt       |           |
|                                         | 37        |          |          | wt        |          |          |          | wt        |       |          |                         |           | wt |          | wt       |           |
|                                         | 38        |          |          | wt        |          | Mut. hom |          |           |       | +1(A)    |                         |           | wt |          | Mut. hom |           |
|                                         | 39        |          |          | wt        |          |          | het      |           |       | wt/+1(G) |                         |           | wt |          | het      |           |
|                                         | 42        |          |          | wt        |          | Mut. hom |          |           |       | +1(A)    |                         |           | wt |          | Mut. hom |           |
|                                         | 43        |          |          | wt        |          |          |          | wt        |       |          |                         |           | wt |          | wt       |           |
|                                         | 44        |          |          | wt        |          |          |          | wt        |       |          |                         |           | wt |          | wt       |           |
| <b>Total</b>                            | <b>33</b> | <b>0</b> | <b>0</b> | <b>33</b> |          | <b>5</b> | <b>2</b> | <b>26</b> |       | <b>3</b> | <b>3</b>                | <b>27</b> |    | <b>8</b> | <b>4</b> | <b>21</b> |



**Supplemental Table 8.** Genotype and mutations of the arabidopsis T2 plants from Line 2 used in this work.

| <i>Arabidopsis thaliana</i> (At5g55250) |              |           |          |          |           |          |          |            |            |          |                         |           |           |           |
|-----------------------------------------|--------------|-----------|----------|----------|-----------|----------|----------|------------|------------|----------|-------------------------|-----------|-----------|-----------|
| Line                                    | Plant        | Target 1  |          |          | Target 2  |          |          | Target 3   |            |          | Genomic Region Genotype |           |           |           |
|                                         |              | Genotype  | Mutation | Genotype | Mutation  | Genotype | Mutation | Genotype   | Mutation   | Genotype | Mutation                | Genotype  |           |           |
| 2                                       | 1            |           |          | wt       |           |          |          |            |            |          |                         |           |           | wt        |
|                                         | 2            |           |          | wt       |           |          |          |            |            |          |                         |           |           | wt        |
|                                         | 3            |           |          | wt       |           |          |          |            | Mut. hom   |          |                         | +1(T)     | Mut. hom  |           |
|                                         | 4            |           |          | wt       |           |          |          |            |            |          |                         |           |           | wt        |
|                                         | 5            |           |          | wt       |           |          |          |            |            |          |                         |           |           | wt        |
|                                         | 6            |           |          | wt       |           |          |          |            |            |          |                         |           |           | wt        |
|                                         | 7            |           |          | wt       |           |          |          |            |            |          |                         |           |           | wt        |
|                                         | 8            |           |          | wt       |           |          |          |            |            |          |                         |           |           | wt        |
|                                         | 9            |           |          | wt       |           |          |          |            |            | het      |                         | wt/+1(T)  |           | het       |
|                                         | 10           |           |          | wt       |           |          |          |            |            |          |                         |           |           | wt        |
|                                         | 11           |           |          | wt       |           |          |          |            |            |          |                         |           |           | wt        |
|                                         | 12           |           |          | wt       |           |          | het      |            | wt/-2      |          |                         |           |           | het       |
|                                         | 13           |           |          | wt       |           |          | het      |            | wt/-2      |          |                         |           |           | het       |
|                                         | 14           |           |          | wt       |           |          |          |            |            |          |                         |           |           | wt        |
|                                         | 15           |           |          | wt       |           |          |          |            |            | Mut. hom |                         |           | +1(T)     | Mut. hom  |
|                                         | 16           |           |          | wt       |           |          |          |            |            |          |                         |           |           | wt        |
|                                         | 17           |           |          | wt       |           |          |          |            |            | Mut. hom |                         |           | +1(T)     | Mut. hom  |
|                                         | 18           |           |          | wt       |           |          |          |            |            |          | het                     |           | wt/+1(T)  | het       |
|                                         | 19           |           |          | wt       |           |          |          |            |            |          |                         |           |           | wt        |
|                                         | 20           |           |          | wt       |           |          |          |            |            | Mut. hom |                         |           | +1(T)     | Mut. hom  |
|                                         | 21           |           |          | wt       |           |          |          |            |            |          |                         |           |           | wt        |
|                                         | 22           |           |          | wt       |           |          |          | het        | wt/+1(C)   |          |                         |           |           | het       |
|                                         | 24           |           |          | wt       |           |          |          |            |            |          | het                     |           | wt/+1(T)  | het       |
|                                         | 25           |           |          | wt       |           |          |          |            |            |          | het                     |           | wt/+1(A)  | het       |
|                                         | 26           |           |          | wt       |           |          |          |            |            |          |                         |           |           | wt        |
|                                         | 27           |           |          | wt       |           |          |          |            |            |          |                         |           |           | wt        |
|                                         | 28           |           |          | wt       |           |          |          |            |            | Mut. hom |                         |           | +1(T)     | Mut. hom  |
|                                         | 29           |           |          | wt       |           |          |          |            |            |          |                         |           |           | wt        |
|                                         | 30           |           |          | wt       |           |          |          |            |            |          |                         |           |           | wt        |
|                                         | 31           |           |          | wt       |           |          |          |            |            |          |                         |           |           | wt        |
|                                         | 32           |           |          | wt       |           |          |          |            |            |          |                         |           |           | wt        |
|                                         | 33           |           |          | wt       |           |          |          |            |            | Mut. hom |                         |           | +1(T)     | Mut. hom  |
|                                         | 34           |           |          | wt       |           |          |          |            |            |          |                         |           |           | wt        |
|                                         | 35           |           |          | wt       |           |          |          |            |            |          |                         |           |           | wt        |
|                                         | 36           |           |          | wt       |           |          |          |            |            | Mut. hom |                         |           | +1(T)     | Mut. hom  |
|                                         | 37           |           |          | wt       |           |          |          |            |            | Mut. hom |                         |           | +1(T)     | Mut. hom  |
|                                         | 38           |           |          | wt       |           |          |          |            |            |          |                         |           |           | wt        |
|                                         | 39           |           |          | wt       |           |          |          |            |            |          |                         |           |           | wt        |
|                                         | 40           |           |          | wt       |           |          |          |            |            | Mut. hom |                         |           | +1(T)     | Mut. hom  |
|                                         | 41           |           |          | wt       |           |          |          |            |            |          |                         |           |           | wt        |
|                                         | 42           |           |          | wt       |           |          |          |            |            |          |                         |           |           | wt        |
|                                         | 43           |           |          | wt       |           |          |          |            |            | Mut. hom |                         |           | +1(T)     | Mut. hom  |
|                                         | 44           |           |          | wt       |           |          |          |            |            |          |                         |           |           | wt        |
|                                         | 45           |           |          | wt       |           |          |          | bi-allelic | -1(C)+1(T) |          |                         |           |           | het       |
|                                         | 46           |           |          | wt       |           |          |          |            |            |          |                         |           |           | wt        |
|                                         | 47           |           |          | wt       |           |          |          |            |            |          | het                     |           | wt/+1(T)  | het       |
|                                         | 48           |           |          | wt       |           |          |          |            |            |          |                         |           |           | wt        |
|                                         | 49           |           |          | wt       |           |          |          |            |            | Mut. hom |                         |           | +1(T)     | Mut. hom  |
|                                         | 50           |           |          | wt       |           |          |          |            |            |          |                         |           |           | wt        |
|                                         | 51           |           |          | wt       |           |          |          |            |            |          | het                     |           | wt/+1(T)  | het       |
|                                         | 52           |           |          | wt       |           |          |          |            |            | Mut. hom |                         |           | +1(T)     | Mut. hom  |
|                                         | 53           |           |          | wt       |           |          |          |            |            |          |                         |           |           | wt        |
|                                         | 54           |           |          | wt       |           |          |          |            |            | Mut. hom |                         |           | +1(T)     | Mut. hom  |
|                                         | 55           |           |          | wt       |           |          |          |            |            |          |                         |           |           | wt        |
|                                         | 56           |           |          | wt       |           |          |          |            |            |          |                         |           |           | wt        |
|                                         | 57           |           |          | wt       |           |          |          |            |            |          | het                     |           | wt/+1(T)  | het       |
|                                         | 58           |           |          | wt       |           |          |          |            |            | Mut. hom |                         |           | +1(T)     | Mut. hom  |
|                                         | 59           |           |          | wt       |           |          |          |            |            | Mut. hom |                         |           | +1(T)     | Mut. hom  |
|                                         | 60           |           |          | wt       |           |          |          |            |            |          | het                     |           | wt/+1(T)  | het       |
|                                         | 61           |           |          | wt       |           |          |          |            |            | Mut. hom |                         |           | +1(T)     | Mut. hom  |
|                                         | 62           |           |          | wt       |           |          |          |            |            |          |                         |           |           | wt        |
|                                         | <b>Total</b> | <b>61</b> | <b>0</b> | <b>0</b> | <b>61</b> | <b>0</b> | <b>4</b> | <b>57</b>  | <b>16</b>  | <b>8</b> | <b>37</b>               | <b>16</b> | <b>12</b> | <b>33</b> |



**Supplemental Table 9.** Genotype and mutations of the arabidopsis T2 plants from Line 3 used in this work.

| <i>Arabidopsis thaliana</i> (At5g55250) |              |           |          |          |           |          |          |           |          |          |                         |          |           |           |    |
|-----------------------------------------|--------------|-----------|----------|----------|-----------|----------|----------|-----------|----------|----------|-------------------------|----------|-----------|-----------|----|
| Line                                    | Plant        | Target 1  |          |          | Target 2  |          |          | Target 3  |          |          | Genomic Region Genotype |          |           |           |    |
|                                         |              | Genotype  |          | Mutation | Genotype  |          | Mutation | Genotype  |          | Mutation |                         |          |           |           |    |
| 3                                       | 1            |           |          | wt       |           |          | wt       |           |          |          | wt                      |          |           | wt        |    |
|                                         | 2            |           |          | wt       |           |          | wt       |           |          |          | wt                      |          |           | wt        |    |
|                                         | 3            |           |          | wt       |           |          | wt       |           |          |          | wt                      |          |           | wt        |    |
|                                         | 4            |           |          | wt       |           |          | wt       |           |          |          | wt                      |          |           | wt        |    |
|                                         | 5            |           |          | wt       |           |          | wt       |           |          |          | wt                      |          |           | wt        |    |
|                                         | 6            |           |          | wt       |           |          | wt       |           |          | Mut. hom |                         | +1(T)    | Mut. hom  |           |    |
|                                         | 7            |           |          | wt       |           |          | wt       |           |          |          |                         | wt       |           |           | wt |
|                                         | 8            |           |          | wt       |           |          | wt       |           |          |          |                         | wt       |           |           | wt |
|                                         | 9            |           |          | wt       |           |          | wt       |           |          |          |                         | wt       |           |           | wt |
|                                         | 10           |           |          | wt       |           |          | wt       |           |          |          |                         | wt       |           |           | wt |
|                                         | 11           |           |          | wt       |           | het      |          | wt/+1(C)  |          |          |                         | wt       |           | het       |    |
|                                         | 12           |           |          | wt       |           |          |          | wt        |          |          |                         | wt       |           |           | wt |
|                                         | 13           |           |          | wt       |           |          |          | wt        |          |          |                         | wt       |           |           | wt |
|                                         | 14           |           |          | wt       |           |          |          | wt        |          |          |                         | wt       |           |           | wt |
|                                         | 15           |           |          | wt       |           |          |          | wt        |          |          |                         | wt       |           |           | wt |
|                                         | 16           |           |          | wt       |           |          |          | wt        |          |          |                         | wt       |           |           | wt |
|                                         | 17           |           |          | wt       |           |          |          | wt        |          | het      |                         | wt/+1(T) |           | het       |    |
|                                         | 18           |           |          | wt       |           |          |          | wt        |          |          |                         | wt       |           |           | wt |
|                                         | 19           |           |          | wt       |           |          |          | wt        |          |          |                         | wt       |           |           | wt |
|                                         | 20           |           |          | wt       |           |          |          | wt        |          | het      |                         | wt/+1(T) |           | het       |    |
|                                         | 21           |           |          | wt       |           |          |          | wt        |          |          |                         | wt       |           |           | wt |
|                                         | 22           |           |          | wt       |           |          |          | wt        |          |          |                         | wt       |           |           | wt |
|                                         | 23           |           |          | wt       |           |          |          | wt        |          | het      |                         | wt/+1(T) |           | het       |    |
|                                         | 24           |           |          | wt       |           |          |          | wt        |          |          |                         | wt       |           |           | wt |
|                                         | 26           |           |          | wt       |           |          |          | wt        |          | het      |                         | wt/+1(T) |           | het       |    |
|                                         | 27           |           |          | wt       |           | het      |          | wt/+1(T)  |          |          |                         | wt       |           | het       |    |
|                                         | 28           |           |          | wt       |           |          |          | wt        |          | Mut. hom |                         | +1(T)    | Mut. hom  |           |    |
|                                         | 29           |           |          | wt       |           |          |          | wt        |          | het      |                         | wt/+1(T) |           | het       |    |
|                                         | 30           |           |          | wt       |           |          |          | wt        |          |          |                         | wt       |           |           | wt |
|                                         | 31           |           |          | wt       |           |          |          | wt        |          |          |                         | wt       |           |           | wt |
|                                         | 32           |           |          | wt       |           |          |          | wt        |          |          |                         | wt       |           |           | wt |
|                                         | 33           |           |          | wt       |           |          |          | wt        |          |          |                         | wt       |           |           | wt |
|                                         | 34           |           |          | wt       |           |          |          | wt        |          |          |                         | wt       |           |           | wt |
|                                         | 35           |           |          | wt       |           | Mut. hom |          | +1(T)     |          | het      |                         | wt/+1(T) |           | het       |    |
|                                         | 37           |           |          | wt       |           |          |          | wt        |          | het      |                         | wt/+1(T) |           | het       |    |
|                                         | 38           |           |          | wt       |           |          |          | wt        |          |          |                         | wt       |           |           | wt |
|                                         | 39           |           |          | wt       |           |          |          | wt        |          |          |                         | wt       |           |           | wt |
|                                         | 40           |           |          | wt       |           |          |          | wt        |          |          |                         | wt       |           |           | wt |
|                                         | 41           |           |          | wt       |           |          |          | wt        |          |          |                         | wt       |           |           | wt |
|                                         | 42           |           |          | wt       |           |          |          | wt        |          | het      |                         | wt/+1(T) |           | het       |    |
|                                         | 43           |           |          | wt       |           |          |          | wt        |          |          |                         | wt       |           |           | wt |
|                                         | 44           |           | het      |          | wt/del240 |          | het      | wt/del240 |          |          |                         | wt       |           | het       |    |
|                                         | 45           |           |          | wt       |           |          |          | wt        |          |          |                         | wt       |           |           | wt |
|                                         | 51           |           | het      |          | wt/del240 |          | het      | wt/del240 |          |          |                         | wt       |           | het       |    |
|                                         | <b>Total</b> | <b>44</b> | <b>0</b> | <b>2</b> | <b>42</b> | <b>1</b> | <b>4</b> | <b>39</b> | <b>2</b> | <b>8</b> | <b>34</b>               | <b>2</b> | <b>12</b> | <b>30</b> |    |



**Supplemental Table 10.** Genotype and mutations of the arabidopsis T2 plants from Line 5 used in this work.

| Arabidopsis thaliana (At5g55250) |           |          |          |           |          |          |            |           |               |           |                         |           |                |          |
|----------------------------------|-----------|----------|----------|-----------|----------|----------|------------|-----------|---------------|-----------|-------------------------|-----------|----------------|----------|
| Line                             | Plant     | Target 1 |          |           | Target 2 |          |            | Target 3  |               |           | Genomic Region Genotype |           |                |          |
|                                  |           | Genotype |          | Mutation  | Genotype |          | Mutation   | Genotype  |               | Mutation  | Genomic Region Genotype |           |                |          |
| 5                                | 1         |          |          | wt        |          | het      |            | wt/+1(A)  |               | het       |                         | wt/+1(T)  |                | het      |
|                                  | 2         |          |          | wt        |          | het      |            | wt/+1(T)  |               | het       |                         | wt/+2(TT) |                | het      |
|                                  | 3         |          |          | wt        |          |          | wt         |           |               |           | wt                      |           |                | wt       |
|                                  | 4         |          |          | wt        |          |          | wt         |           |               |           | wt                      |           |                | wt       |
|                                  | 5         |          |          | wt        |          |          | wt         |           |               | Mut. hom  |                         | del4      | Mut. hom       |          |
|                                  | 6         |          |          | wt        |          |          | wt         |           |               |           | wt                      |           |                | wt       |
|                                  | 7         |          |          | wt        |          |          | wt         |           |               |           | het                     |           | wt/+2(TT)      | het      |
|                                  | 8         |          |          | wt        |          |          | wt         |           |               |           | het                     |           | wt/+1(T)       | het      |
|                                  | 9         |          |          | wt        |          |          | wt         |           |               |           | wt                      |           |                | wt       |
|                                  | 10        |          |          | wt        |          |          | bi-allelic |           | +1(A)/ del193 |           | bi-allelic              |           | +1(T) / del193 | het      |
|                                  | 11        |          |          | wt        |          |          | het        |           | wt/-1(C)      |           | het                     |           | wt/+1(T)       | het      |
|                                  | 12        |          |          | wt        |          |          | wt         |           |               |           | het                     |           | wt/del4        | het      |
|                                  | 13        |          |          | wt        |          |          | bi-allelic |           | +1(A)/+1(C)   |           | het                     |           | wt/+1(T)       | het      |
|                                  | 14        |          |          | wt        |          |          | wt         |           |               | Mut. hom  |                         |           | +1(T)          | Mut. hom |
|                                  | 15        |          |          | wt        |          |          | wt         |           |               |           |                         | wt        |                | wt       |
|                                  | 16        |          | het      |           | wt/del3  |          | wt         |           |               |           |                         | wt        |                | het      |
|                                  | 17        |          |          |           | wt       |          | wt         |           |               |           |                         | wt        |                | wt       |
|                                  | 18        |          |          |           | wt       |          | wt         |           |               |           |                         | wt        |                | wt       |
|                                  | 19        |          |          |           | wt       |          | Mut. hom   |           | del193        | Mut. hom  |                         |           | del193         | Mut. hom |
|                                  | 20        |          |          |           | wt       |          | wt         |           |               | Mut. hom  |                         |           | del4           | Mut. hom |
|                                  | 21        |          |          |           | wt       |          | wt         |           |               | Mut. hom  |                         |           | +1(T)          | Mut. hom |
|                                  | 22        |          |          |           | wt       |          | wt         |           |               |           |                         | wt        |                | wt       |
|                                  | 23        |          |          |           | wt       |          | wt         |           |               |           |                         | wt        |                | wt       |
|                                  | 24        |          |          |           | wt       |          | bi-allelic |           | +1(A)/ del193 |           | bi-allelic              |           | +1(T) / del193 | het      |
|                                  | 25        |          |          |           | wt       |          | wt         |           |               |           |                         | wt        |                | wt       |
|                                  | 26        |          |          |           | wt       |          | wt         |           |               |           | het                     |           | wt/+2(TT)      | het      |
|                                  | 27        |          |          |           | wt       |          | wt         |           |               | Mut. hom  |                         |           |                | Mut. hom |
|                                  | 28        |          |          |           | wt       |          | wt         |           |               |           | het                     |           | wt/del4        | het      |
|                                  | 29        |          |          |           | wt       |          | wt         |           |               |           | het                     |           | wt/del4        | het      |
|                                  | 30        |          |          |           | wt       |          | wt         |           |               |           | het                     |           | wt/del4        | het      |
|                                  | 31        |          |          |           | wt       |          | wt         |           |               |           | het                     |           | wt/del4        | het      |
|                                  | 32        |          |          |           | wt       |          | wt         |           |               |           |                         | wt        |                | wt       |
|                                  | 33        |          |          |           | wt       |          | wt         |           |               |           |                         | wt        |                | wt       |
|                                  | 34        |          |          |           | wt       |          | wt         |           |               |           |                         | wt        |                | wt       |
|                                  | 35        |          |          |           | wt       |          | Mut. hom   |           | del193        | Mut. hom  |                         |           | del193         | Mut. hom |
|                                  | 36        |          |          |           | wt       |          | wt         |           |               |           |                         | wt        |                | wt       |
|                                  | 37        |          |          |           | wt       |          | wt         |           |               |           | het                     |           | wt/del4        | het      |
|                                  | 38        |          |          |           | wt       |          | wt         |           |               |           | het                     |           | wt/+2(TT)      | het      |
|                                  | 39        |          |          |           | wt       |          | wt         |           |               | Mut. hom  |                         |           | +1(T)          | Mut. hom |
|                                  | 40        |          |          |           | wt       |          | wt         |           |               | Mut. hom  |                         |           | +2(TT)         | Mut. hom |
|                                  | 41        |          |          |           | wt       |          | wt         |           |               |           | het                     |           | wt/+2(TT)      | het      |
|                                  | 42        |          |          |           | wt       |          | wt         |           |               |           | het                     |           | wt/+1(T)       | het      |
|                                  | 43        |          |          |           | wt       |          | wt         |           |               | Mut. hom  |                         |           | +1(T)          | Mut. hom |
|                                  | 44        |          |          |           | wt       |          | wt         |           |               | Mut. hom  |                         |           | +1(T)          | Mut. hom |
|                                  | 45        |          |          |           | wt       |          | wt         |           |               | Mut. hom  |                         |           | +1(T)          | Mut. hom |
|                                  | 46        |          |          |           | wt       |          | wt         |           |               |           | het                     |           | wt/del4        | het      |
|                                  | 47        |          |          |           | wt       |          | wt         |           |               | Mut. hom  |                         |           | +1(T)          | Mut. hom |
|                                  | 48        |          |          |           | wt       |          | wt         |           |               |           |                         | wt        |                | wt       |
|                                  | 49        |          |          |           | wt       |          | Mut. hom   |           | del193        | Mut. hom  |                         |           | del193         | Mut. hom |
|                                  | 50        |          |          |           | wt       |          | wt         |           |               | Mut. hom  |                         |           | del4           | Mut. hom |
|                                  | 51        |          |          |           | wt       |          | wt         |           |               |           |                         | wt        |                | wt       |
|                                  | 52        |          |          |           | wt       |          | wt         |           |               | Mut. hom  |                         |           | del4           | Mut. hom |
|                                  | 53        |          |          |           | wt       |          | wt         |           |               |           |                         | wt        |                | wt       |
|                                  | 54        |          |          |           | wt       |          | wt         |           |               |           |                         | wt        |                | wt       |
|                                  | 55        |          |          |           | wt       |          | het        |           | wt/-2(CA)     |           |                         | wt        |                | het      |
|                                  | 56        |          |          |           | wt       |          | wt         |           |               |           | het                     |           | wt/+2(TT)      | het      |
|                                  | 57        |          |          |           | wt       |          | wt         |           |               |           | het                     |           | wt/+2(TT)      | het      |
|                                  | 58        |          |          |           | wt       |          | wt         |           |               | Mut. hom  |                         |           | +2(TT)         | Mut. hom |
|                                  | 59        |          |          |           | wt       |          | wt         |           |               |           |                         | wt        |                | wt       |
|                                  | 60        |          |          |           | wt       |          | wt         |           |               |           |                         | wt        |                | wt       |
|                                  | 61        |          |          |           | wt       |          | het        |           | wt/-2(CA)     |           | het                     |           | wt/del4        | het      |
|                                  | 62        |          |          |           | wt       |          | wt         |           |               |           |                         | wt        |                | wt       |
|                                  | 63        |          |          |           | wt       |          | wt         |           |               |           |                         | wt        |                | wt       |
|                                  | 64        |          |          |           | wt       |          | wt         |           |               |           |                         | wt        |                | wt       |
|                                  | 65        |          |          |           | wt       |          | wt         |           |               |           | het                     |           | wt/+1(T)       | het      |
|                                  | 66        |          |          |           | wt       |          | wt         |           |               |           |                         | wt        |                | wt       |
|                                  | 67        |          |          |           | wt       |          | wt         |           |               | Mut. hom  |                         |           | +1(T)          | Mut. hom |
|                                  | 68        |          |          |           | wt       |          | wt         |           |               |           | het                     |           | wt/del4        | het      |
|                                  | 69        |          |          |           | wt       |          | wt         |           |               |           | het                     |           | wt/+2(TT)      | het      |
|                                  | 70        |          |          |           | wt       |          | wt         |           |               |           |                         | wt        |                | wt       |
|                                  | 71        |          |          |           | wt       |          | wt         |           |               |           |                         | wt        |                | wt       |
|                                  | 72        |          |          |           | wt       |          | wt         |           |               | Mut. hom  |                         |           | +1(T)          | Mut. hom |
|                                  | 73        |          |          |           | wt       |          | wt         |           |               | Mut. hom  |                         |           | +1(T)          | Mut. hom |
|                                  | 74        |          |          |           | wt       |          | het        |           | +1(A)/+1(C)   | Mut. hom  |                         |           | +1(T)          | het      |
|                                  | 75        |          |          |           | wt       |          | wt         |           |               |           | het                     |           | wt/+2(TT)      | het      |
|                                  | 76        |          |          |           | wt       |          | wt         |           |               |           |                         | wt        |                | wt       |
| <b>Total</b>                     | <b>76</b> | <b>0</b> | <b>1</b> | <b>75</b> | <b>3</b> | <b>9</b> | <b>64</b>  | <b>21</b> | <b>26</b>     | <b>29</b> | <b>20</b>               | <b>29</b> | <b>27</b>      |          |
